1           **Title:** Protective mitochondrial fission induced by stress responsive protein GJA1-20k

2

3           **Authors**

4           Daisuke Shimura<sup>1</sup>, Esther Nuebel<sup>2,3,4</sup>, Rachel Baum<sup>1</sup>, Shaohua Xiao<sup>5</sup>, Junco S. Warren<sup>1</sup>,

5           TingTing Hong<sup>1,6,7</sup>, Jared Rutter<sup>2,3,6</sup> & Robin M. Shaw<sup>1,\*</sup>

6

7           **Affiliations**

8           1, Nora Eccles Harrison Cardiovascular Research and Training Institute, University of Utah, Salt  
9           Lake City, UT, USA.

10          2, Howard Hughes Medical Institute, University of Utah, Salt Lake City, UT, USA.

11          3, Department of Biochemistry, University of Utah, Salt Lake City, UT, USA.

12          4, Biomedical Sciences, Noorda College of Osteopathic Medicine, Provo, UT, USA

13          5, Department of Neurology, University of California at Los Angeles, Los Angeles, CA, USA.

14          6, Diabetes and Metabolism Research Center, University of Utah, Salt Lake City, UT, USA.

15          7, Department of Pharmacology and Toxicology, College of Pharmacy, University of Utah, Salt  
16          Lake City, UT, USA.

17          \*Correspondence: [Robin.Shaw@hsc.utah.edu](mailto:Robin.Shaw@hsc.utah.edu)

18 **Abstract**

19 The Connexin43 gap junction gene *GJA1* has one coding exon, but its mRNA undergoes internal  
20 translation to generate N-terminal truncated isoforms of Connexin43 with the predominant  
21 isoform being only 20 kDa in size (GJA1-20k). Endogenous GJA1-20k protein is not membrane  
22 bound, and has been found to increase in response to ischemic stress, localize to mitochondria,  
23 and mimic ischemic preconditioning protection in the heart. However, it is not known how  
24 GJA1-20k benefits mitochondria to provide this protection. Here, we identify that GJA1-20k  
25 polymerizes actin around mitochondria which induces focal constriction sites. Mitochondrial  
26 fission events occur within about 45 seconds of GJA1-20k recruitment of actin. Interestingly,  
27 GJA1-20k mediated fission is independent of canonical Dynamin Related Protein 1 (DRP1). We  
28 find that GJA1-20k induced smaller mitochondria have decreased reactive oxygen species (ROS)  
29 generation and, in hearts, provide potent protection against ischemia-reperfusion injury. The  
30 results indicate that stress responsive internally translated GJA1-20k stabilizes polymerized actin  
31 filaments to stimulate non-canonical mitochondrial fission which limits ischemic-reperfusion  
32 induced myocardial infarction.

### 33 **Introduction**

34           Ischemia-Reperfusion (I/R) injury is known to induce excessive reactive oxygen species  
35 (ROS) in mitochondria, which results in cellular dysfunction and organ damage. Interestingly,  
36 the phenomenon of ischemic preconditioning, first described thirty-five years ago (Murry et al.,  
37 1986), is a potent yet ironic protection of organs from ischemia-induced damage achieved by  
38 preceding the full ischemic insult with shorter bouts of ischemia. Despite the large therapeutic  
39 potential of preconditioning for any organ such as heart, kidney, skeletal muscle, or brain  
40 subjected to anticipated ischemia, the mechanisms of preconditioning are not well understood,  
41 nor has an intervention been identified to successfully translate the phenomenon into clinical  
42 utility (Heusch and Gersh, 2020).

43           Related to preconditioning is the perplexing dynamic regulation of mitochondria itself.  
44 Mitochondria undergo both fission and fusion in an adaptive equilibrium which directly affects  
45 cellular activity and response to stress (Friedman and Nunnari, 2014, Youle and van der Bliek,  
46 2012). It is not clear if an overall shift to fission or fusion is sufficient to define mitochondrial  
47 fidelity, or whether a change in the fission-fusion equilibrium occurs secondary to multiple  
48 distinct pathways which could be either beneficial or harmful, depending on the pathway taken.  
49 For instance, is mitochondrial fission a causative element of ROS generation, apoptosis, cellular  
50 senescence, and cell death (Nishimura et al., 2018, Suen et al., 2008, Wang et al., 2017), or is  
51 fission actually protective, such as by promoting mitophagy which can promote survival  
52 (Shirakabe et al., 2016, Burman et al., 2017)? The nuance in understanding the context of  
53 mitochondrial fission helps explain the complex relationship between mitochondrial morphology  
54 and function (Picard et al., 2013, Song et al., 2015, Nunnari and Suomalainen, 2012). If we have  
55 a better understanding of conditions in which mitochondrial fission results from a protective

56 mechanism, we will be closer to learning how to preserve mitochondrial fidelity in the setting of  
57 ischemic and reperfusion stress.

58 Both the gap junction protein Connexin43 (Cx43) and mitochondria are associated with  
59 preconditioning protection (Basheer et al., 2018, Rodriguez-Sinovas et al., 2018, Garcia-Dorado  
60 et al., 2006). Little is known how the gap junction channel and organelle convey protection  
61 during preconditioning. *GJAI*, which encodes Cx43, has a single coding exon and thus is not  
62 subject to splicing (Smyth and Shaw, 2013). However, *GJAI* mRNA is subject to endogenous  
63 internal translation generating several N-terminal truncated isoforms (Smyth and Shaw, 2013,  
64 Salat-Canela et al., 2014, Ul-Hussain et al., 2014). GJA1-20k, which contains the full Cx43 C-  
65 terminus but lacks transmembrane domains, is the most abundant and most common smaller  
66 isoform and is essential to full length Cx43 trafficking (Smyth and Shaw, 2013, Xiao et al.,  
67 2020) by recruiting cytoplasmic actin to organize trafficking pathways (Basheer et al., 2017). In  
68 addition, GJA1-20k is highly enriched at the outer mitochondrial membrane (Fu et al., 2017,  
69 Basheer et al., 2018). GJA1-20k abundance increases with hypoxic and ischemic stress (Basheer  
70 et al., 2018), resulting in a phenotypically profound cardiac protection that mimics ischemic  
71 preconditioning (Basheer et al., 2018, Wang et al., 2019). It is not known how GJA1-20k  
72 protects mitochondria during stress.

73 In the present study, we found an inverse relationship between the presence of GJA1-20k  
74 and mitochondria size in cultured cells and mice. This relationship is not affected by typical  
75 mediators of mitochondrial dynamics by Dynamin Related Protein 1 (DRP1), but rather is  
76 strongly dependent on actin dynamics. With the generation of smaller actin-associated  
77 mitochondria, we observed decreased oxygen consumption, decreased ROS generation, and  
78 profound protection against ischemia-reperfusion damage. Our data demonstrate a novel non-

79 canonical mechanism of protective mitochondrial fission which is dependent on GJA1-20k and  
80 cytoskeletal dynamics. The findings also identify GJA1-20k as a pharmaceutical candidate for  
81 protection of organs undergoing anticipated ischemia.

82

## 83 **Results**

### 84 **GJA1-20k induces mitochondrial fission in vitro and in vivo**

85 To understand the interplay between GJA1-20k and mitochondria, we expressed GJA1-  
86 20k in HEK293 cells and analyzed mitochondrial morphology by fluorescence imaging. GJA1-  
87 20k co-localizes with mitochondria and its presence results in a more rounded and punctate  
88 appearance of the mitochondria. GJA1-20k also induces a 54% decrease in average  
89 mitochondrial area (Figure 1A, F). siRNA-mediated knock-down of *GJA1* expression (Figure  
90 1—figure supplement 1A) conversely increases mitochondrial area by 20% (Figure 1B, F).  
91 Furthermore, mitochondrial size after *GJA1* knock-down can be rescued by siRNA resistant  
92 GJA1-20k overexpression, but not with overexpression of siRNA resistant Cx43-M6L, which  
93 expresses full-length Cx43 without the truncated isoforms (Smyth and Shaw, 2013) (Figure 1—  
94 figure supplement 1B, C). Together, these data suggest that the short GJA1-20k isoform, but not  
95 full-length Cx43, reduces mitochondrial size.

96 Since GJA1-20k is abundantly expressed in cardiomyocytes (CMs) suggesting an  
97 important function in heart (Xiao et al., 2020, Smyth and Shaw, 2013), and GJA1-20k can  
98 convey ischemic preconditioning protection in heart (Basheer et al., 2018) we used  
99 cardiomyocytes as a primary cell model to explore GJA1-20k function. We overexpressed  
100 GJA1-20k by adenovirus transduction in wild type (WT) neonatal mouse CMs and found a  
101 decrease in the average mitochondria area (Figure 1C, F). We then used neonatal CMs from a

102 *Gjal*<sup>M213L/M213L</sup> mouse line that was recently generated by mutating the internal AUG  
103 (Methionine) at residue 213 of *Gjal* to UUA (Leucine). This M213L mutation removes the  
104 internal translation start site, resulting in expression of full length Cx43 protein but not the  
105 internally translated GJA1-20k isoform (Xiao et al., 2020). Neonatal CMs from *Gjal*<sup>M213L/M213L</sup>  
106 mice have an increase in their average area of mitochondria (Figure 1C, F), in contrast to the  
107 decrease in mitochondrial area of neonatal CMs with GJA1-20k overexpression (Figure 1C, F).  
108 Thus, both cultured cells and neonatal mouse cardiomyocytes exhibit an inverse relationship  
109 between the presence of GJA1-20k and mitochondrial size.

110 The homozygous *Gjal*<sup>M213L/M213L</sup> mice, which lack the expression of GJA1-20k but not  
111 full-length Cx43, die from poor gap junction trafficking and arrhythmogenic sudden cardiac  
112 death two to four weeks after birth (Xiao et al., 2020). We therefore pre-emptively sacrificed and  
113 examined two-week old homozygous *Gjal*<sup>M213L/M213L</sup> mice, and explored mitochondrial size by  
114 electron microscopy (EM). The mitochondria of two-week old cardiomyocytes deficient of  
115 GJA1-20k are enlarged (Figure 1D, F). We then delivered exogenous GJA1-20k using adeno-  
116 associated virus type 9 (AAV9) to 8 week old adult WT mice (Basheer et al., 2018) and found a  
117 decrease in the average mitochondrial area (Figure 1E, F). Taken together, in cell lines, neonatal  
118 CM, young mouse hearts, and mature mouse hearts, an increase in GJA1-20k results in smaller  
119 mitochondria, whereas a decrease in GJA1-20k results in larger mitochondria.

120

## 121 **Canonical mitochondrial dynamics are not involved**

122 Mitochondrial dynamics are regulated by well-known mediators including DRP1 for  
123 fission (Friedman and Nunnari, 2014), and MFN1 and MFN2 for fusion (Schrepfer and  
124 Scorrano, 2016). DRP1 is potentiated by phosphorylation of its Serine 616 (Sabouny and Shutt,

125 2020). We tested abundance of total DRP1 and phosphorylated DRP1 (DRP1-pS616) in GJA1-  
126 20k transfected HEK293 cells and found no significant difference in either the protein levels of  
127 total DRP1 or DRP1-pS616 or in the ratio (pS616/total) (Figure 2A, B). The levels of MFN1 and  
128 MFN2, and mitochondrial marker protein TOM20, a marker of cellular mitochondrial content,  
129 were also unchanged (Figure 2A, B).

130 To further investigate whether GJA1-20k induced reduction in mitochondrial size is  
131 dependent on DRP1, we analyzed mitochondrial morphology after inhibiting DRP1 by treating  
132 cells pharmacologically with mitochondrial division inhibitor 1 (Mdivi-1), or by performing  
133 siRNA-mediated *DRP1* knock-down (Figure 2—figure supplement 1A), all with or without  
134 GJA1-20k transfection. With either method of DRP1 inhibition, the average area of individual  
135 mitochondria increased, consistent with inhibiting canonical fission (Figure 2C–F). However,  
136 GJA1-20k acts epistatically to DRP1 loss and prevents DRP1-mediated mitochondrial  
137 enlargement (Figure 2C–F; Figure 2—figure supplement 1B, C), indicating GJA1-20k can act at  
138 or downstream of DRP1 activation.

139

#### 140 **GJA1-20k interacts with actin to induce fission**

141 The actin cytoskeleton and its dynamics have been implicated as fundamental mediators  
142 of mitochondrial fission (Korobova et al., 2013, Hatch et al., 2014, Ji et al., 2015, Moore et al.,  
143 2016). GJA1-20k has been previously identified to cluster with and stabilize the actin network  
144 both in vitro and in vivo (Basheer et al., 2017). We imaged actin in GJA1-20k transfected  
145 HEK293 cells and noted that, in the presence of GJA1-20k, actin assembles around  
146 mitochondria, forming filamentous rings surrounding the outer membrane (Figure 3A). We used  
147 biochemical methods to confirm that GJA1-20k induces association of actin and mitochondria.

148 Cytosolic and mitochondrial pools of proteins were separated and actin protein levels were  
149 measured in each fraction. As seen in Figure 3B, C, the large increase in mitochondrial  
150 associated actin occurs in the presence of GJA1-20k. Together these data provide both imaging  
151 and biochemical evidence that GJA1-20k recruits the actin cytoskeleton to the mitochondrial  
152 membrane.

153         The actin rings of Figure 3A are filamentous, indicating formation or stabilization of  
154 actin polymers. We asked how GJA1-20k alone, which localizes to the mitochondrial outer  
155 membrane (Basheer et al., 2018), can recruit and polymerize actin around mitochondria (Figure  
156 3A). Using a reductionist cell-free assay of actin polymerization, we found that GJA1-20k does  
157 not directly promote actin polymerization (Figure 3D), and the polymerization kinetics is even  
158 slightly slowed down in the presence of GJA1-20K. However, GJA1-20k causes a leftward shift  
159 in the polymerization-depolymerization equilibrium (Blanchoin et al., 2014) by directly  
160 inhibiting actin depolymerization (Figure 3E). The effect of substantial GJA1-20k, by inhibiting  
161 depolymerization, is to cause a net increase in polymerization. Because GJA1-20k enriches at  
162 outer mitochondrial membrane (Fu et al., 2017, Basheer et al., 2018), the GJA1-20k induced  
163 polymerization will occur at and around the mitochondrial membrane. Interestingly, GJA1-20k  
164 results in net actin polymerization even in the presence of Latrunculin A (LatA), a known potent  
165 inhibitor of actin polymerization (Fujiwara et al., 2018) (Figure 3E). In cells, it has been reported  
166 that LatA increases individual mitochondrial area, consistent with an inhibition of actin-  
167 dependent mitochondrial fission (Figure 3F, G)(Korobova et al., 2013, Li et al., 2018, Moore et  
168 al., 2016). However, the presence of GJA1-20k counteracts the LatA effect, preserving acting  
169 polymerization and preventing an overall increase in mitochondrial size (Figure 3F, G).



170 Use of fluorescently labelled actin, GJA1-20k, and mitochondria permit real time  
171 imaging of mitochondrial fission events at actin assembly sites. As seen in Video 1 and 2; and  
172 Figure 4A, C, GJA1-20k recruits actin to mitochondria, which often results in fission. In Video 1  
173 and 2, the actin network can be seen to develop around mitochondria and, coinciding with GJA1-  
174 20k intensity, forms an increasingly tight band across a mitochondrion which, within one minute,  
175 results in mitochondrial fission. The imaging in the bottom row of Figure 4A, C, and in the right  
176 column of Video 1 and 2, were obtained by multiplying GJA1-20k signal with actin signal,  
177 highlighting the locations at which GJA1-20k and actin are coincident. The respective line-scan  
178 profiles in Figure 4B, D indicate that mitochondrial fission occurs at points where the product of  
179 GJA1-20k and actin is the highest. Following accumulation of GJA1-20k and actin (red lines) at  
180 these points, a drop in mitochondrial signal (blue lines) is apparent when fission occurs. Fission  
181 (low point of blue lines) occurs approximately 45 seconds after co-accumulation of GJA1-20k  
182 and actin (high point of red lines, Figure 4B, D). Time to fission was computed from the time of  
183 peak GJA1-20k and actin intensity product, to the time of mitochondrial signal being reduced to  
184 background (Figure 4E–G). Statistically, this time to fission occurred at a median of 45 seconds,  
185 with a standard deviation of 11 seconds (Figure 4H). Note, the real time imaging shown in Video  
186 1 and 2, and Figure 4 were performed in the presence of DRP1 inhibitor Mdivi-1. Therefore, the  
187 mitochondrial fission induced by cooperation between GJA1-20k and actin can be independent  
188 of canonical DRP1-mediated fission.

189

### 190 **GJA1-20k induces protective effects against oxidative stress**

191 It has been found that AAV9-mediated GJA1-20k overexpression in mouse heart  
192 depresses mitochondrial respiration, which has the beneficial effect of limiting myocardial

193 infarction after ischemic-reperfusion (I/R) injury (Basheer et al., 2018). We measured oxygen  
194 consumption rate (OCR) using a Seahorse mitochondrial stress test in GJA1-20k transfected  
195 HEK293 cells and found a decrease in maximal respiration (Figure 5A, B), consistent with  
196 previous results (Basheer et al., 2018). In contrast, maximal respiration is significantly increased  
197 in neonatal CMs derived from GJA1-20k deficient *Gja1*<sup>M213L/M213L</sup> mice (Figure 5C, D).

198         Given that GJA1-20k is a stress-responsive protein which can mediate ischemic  
199 preconditioning (Basheer et al., 2018), we measured reactive oxygen species (ROS) in HEK293  
200 cells under oxidative stress induced by exogenous H<sub>2</sub>O<sub>2</sub> treatment. In unstressed cells, the  
201 presence of GJA1-20k does not affect mitochondrial ROS generation (Figure 5E, F) whereas in  
202 the presence of exogenous H<sub>2</sub>O<sub>2</sub>, GJA1-20k prevents an increase in mitochondrial ROS (Figure  
203 5E, F). Thus, GJA1-20k, which depresses mitochondrial respiration in unstressed cells (Figure  
204 5A, B), does not affect homeostatic ROS generation, yet has the beneficial effect of decreasing  
205 toxic ROS generation during stress (Figure 5E, F).

206         To explore whether GJA1-20k is necessary to protect against oxidative injury in heart  
207 muscle we subjected Langendorff-perfused adult hearts from heterozygous *Gja1*<sup>M213L/WT</sup> mice to  
208 ischemia-reperfusion (I/R) injury. Since homozygous *Gja1*<sup>M213L/M213L</sup> mice die in two to four  
209 weeks after birth, we used heterozygous *Gja1*<sup>M213L/WT</sup> mice to be able to work with adult hearts.  
210 At baseline, adult *Gja1*<sup>M213L/WT</sup> mice have no change in overall phenotype, or cardiac chamber  
211 dimensions or cardiac functional characteristics compared to WT mice, as measured by  
212 echocardiography (Xiao et al., 2020). We also did not find a significant difference in  
213 mitochondrial size under basal conditions (Figure 5—figure supplement 1). However,  
214 remarkably, reduced GJA1-20k expression results in an almost complete cardiac infarction after

215 I/R injury (Figure 5G, H). These data indicate that even partial deletion of GJA1-20k results in a  
216 profoundly impaired response to ischemic stress.

217

## 218 **Discussion**

219 In conclusion, we find that the stress-responsive protein GJA1-20k organizes actin  
220 around mitochondria, promoting an actin-dependent mitochondrial fission process that also  
221 protects against oxidative and ischemic stress (cartoon in Figure 6). This protective fission  
222 pathway is distinct from canonical DRP1-mediated fission. In heart muscle, GJA1-20k appears  
223 to be critical to limit ischemic damage. Adult mice heterozygous for the internal GJA1-20k start  
224 have normal baseline cardiac phenotypes, yet suffer almost complete myocardial infarctions once  
225 subjected to I/R injury (Figure 5G, H).

226 Mitochondrial fusion and fission dynamics are understood to involve several key  
227 molecules. MFN1 and MFN2 have important roles in fusion (Schrepfer and Scorrano, 2016),  
228 while DRP1 mediates canonical fission (Friedman and Nunnari, 2014). A dynamic equilibrium  
229 between fusion and fission is important during development as well as in response to a changing  
230 cellular environment. Alteration of the equilibrium point between fusion and fission occurs with  
231 disease (Chan, 2006). Additionally, in mouse heart, hypertrophy or dilated cardiomyopathy  
232 result from either MFN1 or MFN2 deletion (which causes mitochondrial fragmentation) or  
233 DRP1 deletion (which causes hyperfused mitochondria)(Song et al., 2015). The implication is  
234 that either a leftward or rightward shift in the fusion-fission equilibrium can negatively affect  
235 cardiac function. However, it is becoming increasingly clear that mitochondrial size alone, the  
236 easiest readout of mitochondrial dynamics, is insufficient to interpret whether destructive or pro-  
237 survival pathways are dominant. The presence of GJA1-20k, which increases with ischemic and

238 oxidative stress (Basheer et al., 2018, Ul-Hussain et al., 2014), is clearly beneficial in the setting  
239 of I/R injury (Figure 5G, H). Yet the presence of GJA1-20k, while inducing mitochondrial  
240 fission and smaller mitochondria (Figure 1, 3 and 4), does not either reduce MFN1 or MFN2, or  
241 activate DRP1 (Figure 2). The ability of GJA1-20k to recruit actin to induce fission  
242 independently of DRP1 is novel. GJA1-20k use of actin to cause fission occurs rapidly, within  
243 45 seconds of peak GJA1-20k and actin coincidence at mitochondrial membrane (Figure 4H).  
244 The immediate question is that, given these rapid dynamics, how to limit fission in stable cells,  
245 especially terminally differentiated cells such as adult cardiomyocytes. We have not yet  
246 evaluated whether secondary regulators or post-translational modification of either primary actin  
247 or GJA1-20k affects GJA1-20k mediated mitochondrial dynamics. One simple form of  
248 regulation is in the abundance of GJA1-20k. The paucity of GJA1-20k at baseline, and its large  
249 and rapid increase during the onset of ischemic stress (Basheer et al., 2018), support the role of  
250 GJA1-20k as a stress responsive process which affords acute protection during ischemic injury.

251         While smaller mitochondrial size has been traditionally associated with mitochondrial  
252 fragmentation and poor cellular health (Wai and Langer, 2016), it is now understood that there is  
253 a more complex relationship between mitochondrial size and mitochondrial function (Sprenger  
254 and Langer, 2019). Smaller mitochondria can signal not only disease but also tissue protection  
255 and adaptation. DRP1-induced fission and smaller mitochondria are associated with excess ROS  
256 production, apoptosis, and organ injury (Hu et al., 2017, Wang et al., 2017), whereas DRP1-  
257 independent mitochondrial fission has been observed in cells undergoing protective mitophagy  
258 (Stavru et al., 2013, Yamashita et al., 2016, Coronado et al., 2018). It appears that GJA1-20k  
259 mediated fission is highly beneficial, and part of a pro-survival cellular response to stress. Our  
260 results suggest that mitochondrial morphology (i.e. the overall balance of fusion and fission) in

261 stressed cells should be considered in the context of the presence of specific proteins. For  
262 instance, pathological fission in the presence of activation of DRP1 might indicate mitophagy  
263 (Burman et al., 2017, Wang et al., 2017, Ikeda et al., 2015), whereas an increase in GJA1-20k  
264 implies a stress-induced reduction of ROS generation and beneficial depression of metabolism.  
265 Both DRP1 activation and GJA1-20k generation result in mitochondrial fission, but have  
266 different implications for cellular health.

267         Since its first report 35 years ago, investigators have both tried to understand the  
268 mechanisms of preconditioning as well as use putative mediators of precondition to benefit  
269 organs undergoing anticipated ischemia. These efforts have included dozens of preclinical and  
270 proof-of-concept studies, yet without success (Heusch and Gersh, 2020). Mediators such as  
271 cyclophilin D (Cung et al., 2015), cardiolipin (Gibson et al., 2016), mitochondrial permeability  
272 transition pore (MPTP)(Atar et al., 2015, Schaller et al., 2010), Cx43 (Schulz et al., 2015), ATP-  
273 dependent K<sup>+</sup> channels (Heinzel et al., 2005, Garlid et al., 2009) , STAT3 (Heusch et al., 2011),  
274 GSK3-beta (Juhaszova et al., 2004), and opioid receptors (Dragasis et al., 2013) have been  
275 implicated in preconditioning protection (Heusch and Gersh, 2017), but replicating their  
276 involvement in clinical studies has, to present, failed to be successful. More recently, the  
277 phenomenon of remote preconditioning has been explored as a therapeutic solution, but clinical  
278 application of this approach has also yet to be successful (Heusch and Gersh, 2020). It is possible  
279 that the reason a central mediator of preconditioning has not been determined is that it has not  
280 been available for study. GJA1-20k was first reported to occur endogenously in 2013 (Smyth and  
281 Shaw, 2013) and its association with mitochondria and potential beneficial effects for survival of  
282 I/R was only reported in the last three years (Fu et al., 2017, Basheer et al., 2018, Fu et al., 2020,  
283 Ren et al., 2020, Wang et al., 2019). As a smaller isoform of Cx43 that contains the epitope of

284 most anti-Cx43 antibodies, and is localized to mitochondria (Fu et al., 2017), GJA1-20k could be  
285 central to the studies that implicated Cx43 as a mediator of preconditioning. As a stress  
286 responsive protein (Basheer et al., 2018, Ul-Hussain et al., 2014), endogenous GJA1-20k is  
287 induced by short bouts of ischemia prior to a longer ischemic period (Basheer et al., 2018).  
288 Because GJA1-20k-induced fission is associated with less ROS production with oxidative stress  
289 (Figure 5E, F), the generation of GJA1-20k and subsequent decreased ROS production could  
290 explain the major benefit of pre-conditioning. Less ROS production could limit the amount  
291 myocardial infarction with I/R injury (Figure 5G, H). Stunned myocardium is a clinical term for  
292 quiescent yet viable myocardium post-ischemic injury. The phenomenon of stunned myocardium  
293 is common in patients with I/R injury such as experiencing an occluded coronary artery that is  
294 revascularized, but the mechanism of stunning is not well elucidated. It is possible that stunned  
295 myocardium has elevations of GJA1-20k after the ischemic injury. Of note, stunned myocardium  
296 is metabolically quiescent and also exhibits smaller mitochondria (Borgers, 2002, Borgers et al.,  
297 1993), further supporting the possibility that GJA1-20k is involved in the stunned response to  
298 ischemia as a mechanism of preventing myocardial death. Endogenous induction of GJA1-20k  
299 may also explain other instances when smaller mitochondrial size correlates with a beneficial  
300 effect (Coronado et al., 2018). Recent studies have identified that exogenous GJA1-20k can  
301 protect neurons subjected to traumatic brain injury (Ren et al., 2020), hearts from ischemia  
302 (Basheer et al., 2018) and angiotensin induced hypertrophy (Fu et al., 2020). Furthermore, by  
303 mimicking the protection afforded by ischemic preconditioning, exogenous GJA1-20k is a  
304 promising therapeutic to protect hearts, brains and other organs against expected ischemic  
305 damage.  
306

307 In summary, we identify that upregulation of the stress-responsive internally translated  
308 peptide, GJA1-20k, may be a critical mediators of ischemic-preconditioning protection. GJA1-  
309 20k induces fission by recruiting actin to mitochondria, inducing a fission that decreases ROS  
310 generation and protects organs such as the heart. Use of exogenous GJA1-20k as a therapeutic  
311 can potentially realize the long sought yet still elusive clinical need of preventing organs from  
312 undergoing damage during anticipated ischemia.

313

## 314 **Materials and Methods**

### 315 **Animals**

316 All mice were maintained under sterile barrier conditions. For the exogenous gene delivery, we  
317 used C57BL6 male mice under same conditions at the age of 8 weeks to start the study procedure  
318 according to previous study (Basheer et al., 2018, Basheer et al., 2017). We injected 100  $\mu$ l of 3  
319  $\times 10^{11}$  vector genomes per mL of Adeno-associated virus type 9 (AAV9) vectors containing  
320 GFP-tagged glutathione S-transferase (GST-GFP) or GJA1-20k (GJA1-20k-GFP) driven by the  
321 cytomegalovirus (CMV) promoter through retro-orbital injection. Eight weeks post-injection, the  
322 heart dissection was performed under anesthesia by isoflurane. Heparin (100 IU, i.p.) was  
323 injected 20 – 30 minutes before dissection. We perfused the heart with cold HEPES buffer to  
324 wash out the blood and immediately freeze and proceed DNA extraction. The details of  
325 Gja1<sup>M213L/M213L</sup> mouse generation has been described previously (Xiao et al., 2020). We isolated  
326 neonatal cardiomyocyte (postnatalI 2 – 3 days) from Gja1<sup>M213L/M213L</sup> and Wildtype (WT) mice  
327 using Pierce<sup>TM</sup> Primary Cardiomyocyte Isolation Kit (Thermo Fisher Scientific, Waltham, MA)  
328 following manufacturer protocol. The neonatal cardiomyocyte was seeded into  
329 gelatin/fibronectin coated 35 mm glass-bottomed dish and subjected to imaging as described  
330 below. Adenovirus encoding GJA1-20k-V5 (GFP-V5 as a control; 4 plaque-forming unit/cell)

331 was transduced as previously described (Basheer et al., 2017) followed by live cell imaging. The  
332 average area of individual mitochondria in GFP-V5 control myocyte was unchanged compared  
333 to WT non-transduced cardiomyocytes (Figure 1—figure supplement 1D, E). We also dissected  
334 the heart tissue at the age of two weeks from  $Gja1^{M213L/M213L}$  and WT mice under anesthesia  
335 described above for the following experiments. All animal care and study protocols were  
336 approved by University of Utah Institutional Animal Care and Use Committee.

337

### 338 **Electron microscope imaging**

339 The mouse hearts were prepared as described previously (Basheer et al., 2018). Briefly, the adult  
340 mouse hearts were fixed by perfusing with 2 % glutaraldehyde and 2 % paraformaldehyde in  
341 PBS for 10 minutes followed by post-fixed with 1 % osmium tetroxide and incubated in 3 %  
342 uranyl acetate. The small hearts from young mouse (two weeks old) dissected into 1 mm pieces  
343 were immediately fixed with 2.5% glutaraldehyde, 1% paraformaldehyde, 0.1 M Cacodylate  
344 buffer, pH 7.4, 6 mM  $CaCl_2$ , 4.8% Sucrose, at 4 °C. Following overnight fixation, the  
345 specimens were rinsed 2 times in buffer and were postfixed in 2 % Osmium tetroxide for one  
346 hour at room temperature. The specimens were rinsed in  $dH_2O$  and pre-stained with uranyl  
347 acetate for one hour at room temperature. Then the samples were dehydrated in graded ethanol  
348 series and 3 times in pure acetone then infiltrated and embedded in epoxy resin, Embed 812 (cat  
349 # 14121, Electron Microscopy Sciences, Hatfield, PA). The blocks were cut at 70 nm thickness  
350 using an ultramicrotome (Leica, Wetzlar, Germany) and poststained with uranyl acetate for 10  
351 minutes, and lead citrate for 5 minutes. Sections were examined at an accelerating voltage of 120  
352 kV in a JEM-1400 plus or JEM1200-EX (JEOL, Tokyo, Japan) transmission electron microscope  
353 with CCD Gatan camera. The number and the total area of mitochondria in each image were



354 measured using imageJ and the average area was calculated by dividing the total area by the  
355 number. Electron microscope imaging was performed by the core facility at Electron Microscopy  
356 Laboratory at University of Utah and at the Electron Imaging Center of The California  
357 NanoSystems Institute at University of California, Los Angeles.

358

359 **Cell culture, Plasmid and siRNA transfection, DRP1 inhibition, and Latrunculin A**  
360 **treatment**

361 HEK293 cells were cultured with DMEM containing 10 % fetal bovine serum (FBS), non-  
362 essential amino acids, sodium pyruvate (Thermo Fisher Scientific), and Mycozap-CL (Lonza) in  
363 37 °C, 5 % CO<sub>2</sub> incubator. For imaging analysis, we coated 35 mm glass-bottomed dish with 0.1  
364 % gelatin (Sigma-Aldrich, St. Louis, MO) and human fibronectin (20 µg/ml, Corning)  
365 incubating 37 °C for 2 hours or 4 °C overnight before cell seeding. We seeded the cells (2.0 ×  
366 10<sup>5</sup> cells/dish) into the coated dishes and harvested in the incubator. Next day, we transfected  
367 GST- or GJA1-20k-GFP (0.5 µg/dish) with or without LifeAct-mCherry (1.0 µg/dish) plasmids  
368 as described previously (Fu et al., 2017), using FuGene<sup>®</sup> HD (Promega, Madison, WI) following  
369 manufacturer protocol. The constructs are driven by CMV promoter and internal methionine in  
370 GJA-20k was mutated to leucine to express a single isoform as described previously (Smyth and  
371 Shaw, 2013). After overnight transfection, the cells were subjected to imaging or protein  
372 extraction. To obtain enough proteins from 100 mm culture dish, we multiplied the plasmid  
373 concentration based on bottom surface area of 35 mm dish (approximately 0.05 µg/cm<sup>2</sup>). To  
374 knock-down Gja1 or DRP1, we used Gja1 siRNA (Thermo Fisher Scientific, ID HSS178257),  
375 DRP1 siRNA (Thermo Fisher Scientific, ID 19561), and Stealth RNAi<sup>TM</sup> (Thermo Fisher  
376 Scientific) as negative control. We transfected 25 pmol of siRNA by Lipofectamine<sup>TM</sup>

377 RNAiMAX (Thermo Fisher Scientific) following manufacturer protocol. After overnight  
378 incubation, GST- or GJA1-20k-GFP plasmid was transfected as described above and the samples  
379 were subjected to subsequent experiments. To confirm the knock-down, we used 6-well culture  
380 plate and proceed knock-down exactly same way and same time followed by protein extraction  
381 described below. For pharmacological DRP1 inhibition, a mitochondrial division inhibitor 1  
382 (Mdivi-1, 50  $\mu$ M) or the equal amount of Dimethyl sulfoxide (DMSO) diluted in culture medium  
383 was added to the cells at the same time as the plasmid transfection. After overnight incubation,  
384 the samples were subjected to imaging. To disrupt the actin polymerization, the cells after the  
385 transfection were incubated for 1 hour with Latrunculin A (LatA; 100 nM) or the equal amount  
386 of DMSO diluted in culture medium. After the incubation, the samples were subjected to  
387 imaging.

388

### 389 **Confocal live and fixed cell imaging**

390 We followed the protocol described previously (Fu et al., 2017). The imaging was performed  
391 using a Nikon Eclipse Ti imaging system with a  $\times 100/1.49$  Apo TIRF objective, a spinning disk  
392 confocal unit (Yokogawa, Tokyo, Japan) with 486, 561, and 647 nm diode-pumped solid state  
393 lasers, and an ORCA-Flash 4.0 Hamamatsu camera, controlled by NIS Elements software. For  
394 live cell imaging, the cells were imaged in culture medium using DMEM without Phenol Red  
395 (Thermo Fisher Scientific) for snapshot or time-lapse imaging. The imaging chamber was  
396 maintained 37  $^{\circ}$ C and 5 %  $\text{CO}_2$ . Mitochondria were labeled by incubating 37  $^{\circ}$ C for 20 minutes  
397 with Mitotracker (200 nM, Thermo Fisher Scientific) before imaging. For fixed cell imaging, the  
398 cells were fixed by 4 % paraformaldehyde for 30 minutes at room temperature. After fixation,  
399 the samples were permeabilized in 0.1 % TritonX-100 in PBS for 10 minutes, washed with PBS

400 2 × 5 minutes, and blocked in 5 % normal goat serum (NGS) in PBS for 2 hours at room  
401 temperature. The following primary antibodies were diluted in 1 % NGS in PBS and incubated in  
402 dark moisture chamber at 4 °C overnight; anti-GFP (1:2000, Abcam), anti-TOM20 (1:1000,  
403 Abcam), anti-DRP1 (1:250, Abcam). Next day, the samples were washed with PBS 3 × 10  
404 minutes and incubated with host-matched immunoglobulin cross-adsorbed secondary antibodies  
405 conjugated with Alexa Fluor 488, 555, 647 (1:500, Invitrogen, Carlsbad, CA) in 1% NGS in PBS  
406 for 1 hour at room temperature. After washing with PBS 3 × 10 minutes, the samples were  
407 mounted with ProLong™ Gold antifade reagent with DAPI (Thermo Fisher Scientific). For  
408 image analysis, we used ImageJ with the mito-morphology plugin (Dagda et al., 2009) for  
409 mitochondrial morphology analysis.

410

#### 411 **Western blot analysis**

412 We performed Western blot as previously described (Basheer et al., 2018). We harvested the  
413 cells in 100 mm culture dish or 6-well plate for knock-down experiment transfected plasmid as  
414 described above. The cells were lysed by RIPA buffer (containing 50 mM Tris, 150 mM NaCl, 1  
415 mM EDTA, 1 % TritonX-100, 1 % Sodium Deoxycholate, 1 mM NaF, 0.2 mM Na<sub>3</sub>VO<sub>4</sub>, and  
416 Halt Proteinase and Phosphatase Inhibitor Cocktail (Thermo Fisher Scientific)) to extract total  
417 protein. The lysate was sonicated on ice, rotated for 1 hour at 4 °C, and centrifuged 16,000 ×g  
418 for 20 minutes at 4 °C. The supernatant was collected as the protein sample. To extract  
419 mitochondrial fraction, we used Mitochondria Isolation Kit for Cultured Cells (Thermo Fisher  
420 Scientific) following manufacturer protocol. The protein concentration was measured using  
421 DC™ Protein Assay (Bio-Rad, Hercules, CA). The protein samples with sample buffer  
422 (NuPAGE LDS sample buffer (NP0007) containing 100 mM DTT) were separated using

423 NuPAGE Bis-Tris gels (4 – 12 %) with 3-(N-morpholino)propanesulfonic acid (MOPS) or 2-(N-  
424 morpholino)ethanesulfonic acid (MES) running buffer (Thermo Fisher Scientific) followed by  
425 transferring to polyvinylidene difluoride (PVDF) membrane (Pall Corporation, Port Washington,  
426 NY). After the transferring, the membrane was fixed by soaking in methanol, air drying, and  
427 rewetting in methanol followed by blocking with 5 % non-fat milk or bovine serum albumin (for  
428 phosphorylated protein detection) in Tris-NaCl-Tween (TNT) buffer (containing 150 mM NaCl,  
429 50 mM Tris (pH 8.0), and 0.1 % Tween20) for 1 hour at room temperature. We used following  
430 primary antibodies diluted in TNT buffer; anti-Cx43 C-terminus (1:2000, Sigma-Aldrich), anti-  
431 DRP1 (1:500, Abcam), anti-phospho-DRP1 at S616 (1:1000, Cell Signaling Technology,  
432 Danvers, MA), anti-MFN1 (1:1000, Cell Signaling Technology), anti-MFN2 (1:1000, Abcam),  
433 anti-TOM20 (1:500, Santa Cruz, Dallas, TX), anti-Tubulin (1:2000, Abcam, Cambridge, United  
434 Kingdom), anti-GFP (1:10000, Abcam), anti-PGC-1 $\alpha$  (1:500, Novus Biologicals, Littleton, CO),  
435 anti-mtTFA (1:1000, Abcam), anti-actin (1:2000, Sigma-Aldrich), anti-COX IV (1:1000,  
436 Abcam), and anti-MEK1/2 (1:1000, Cell Signaling Technology). After overnight primary  
437 antibody incubation at 4 °C, the membrane was washed with TNT buffer 3  $\times$  10 minutes and  
438 incubated with host-matched immunoglobulin cross-adsorbed secondary antibodies conjugated  
439 with Alexa Fluor 488, 555, 647 (1:500, Thermo Fisher Scientific) diluted in TNT buffer for 1  
440 hour at room temperature. The membrane was washed with TNT buffer 3  $\times$  10 minutes, soaked  
441 in methanol, and air dried followed by the band detection using Chemidoc MP imaging system  
442 (Bio-Rad). The band intensity was quantified using Image Lab software (Bio-Rad).

443

#### 444 **Protein Purification**

445 GJA1-20k without the putative transmembrane region (amino acids 236 - 382 of the full-length  
446 human Cx43, NCBI reference NP 000156,1) was fused at the N-terminus with a 6 × His tag and  
447 a linker, and at the C-terminus with a linker and 10 Aspartic Acids. The fusion construct was  
448 cloned into the pET301/CT-DEST vector via Gateway cloning (Thermo Fisher Scientific). The  
449 primers to amplify the sequence are: Forward primer: 5' GGGGACAAGTTTGTACAAAA  
450 AAGCAGGCTTCAGGAGGTATACATATGCATCATCATCATCACGGTGGTGGCGGT  
451 TCAGGCGGAGGTGGCTCTGTTAAGGATCGGGTTAAGGGAAAG 3'. Reverse primer: 5'  
452 GGGGACCACTTTGTACAAGAAAGCTGGGTCTTACTAATCGTCATCATCGTCATCATC  
453 GTCATCATCACTTCCACCACTTCCACCGATCTCCAGGTCATCAGGCCG 3'. The fusion  
454 protein was expressed in the E. coli expression strain LOBSTR (Andersen et al., 2013) (Kerafast,  
455 Boston, MA) transformed with pTf16, which encodes the chaperone protein tag (TaKaRa Bio,  
456 Shiga, Japan), following the manufacturer protocol. Protein expression was induced at 37 °C  
457 with 1 mM isopropyl-1-thio-β-galactopyranoside. The bacterial pellet containing induced GJA1-  
458 20k was lysed in B-PER Bacterial Protein Extraction Reagent (Thermo Fisher Scientific)  
459 containing cOmplete ULTRA Protease Inhibitor Tablets (Sigma-Aldrich) and sonicated and  
460 centrifuged to separate soluble proteins. The HisPur Cobalt Purification Kit (Thermo Fisher  
461 Scientific) was used to purify the protein following the manufacturer protocol with some buffer  
462 substitutions. We used a buffer containing 300 mM NaCl, 50 mM NaH<sub>2</sub>PO<sub>4</sub>, 5 mM 2-  
463 mercaptoethanol, pH 8.0 for column equilibration and washing (with addition of 10 mM and 20  
464 mM imidazole for sequential washing steps), and we used an elution buffer containing 300 mM  
465 NaCl, 50 mM NaH<sub>2</sub>PO<sub>4</sub>, 150 mM Imidazole, pH 8.0, 10 % glycerol. Before use, the purified  
466 protein was concentrated and subjected to a buffer exchange into a final buffer containing 50  
467 mM NaH<sub>2</sub>PO<sub>4</sub>, 150 mM NaCl (pH 8.0) with 10 % glycerol.

468

### 469 **Cell-free pyrene-actin polymerization and depolymerization assay**

470 The pyrene-actin polymerization and depolymerization assays were performed using the Actin  
471 Polymerization Biochem Kit (Cytoskeleton, Inc., Denver, CO) following the manufacturer  
472 protocol. Briefly, lyophilized pyrene-conjugated skeletal muscle actin was reconstituted and  
473 diluted to a concentration of 1 mg/ml in G-Buffer (5 mM Tris-HCl pH 8.0, 0.2 mM CaCl<sub>2</sub>, 0.2  
474 mM ATP) and polymerized with 0.25× Actin Polymerization Buffer (500 mM KCl, 20 mM  
475 MgCl<sub>2</sub>, 50 mM guanidine carbonate, 10 mM ATP) for 1 hour at room temperature. F-actin was  
476 incubated with either 15 nM LatA or an equal volume of DMSO, and/or 1 mM GJA1-20k  
477 protein purified as described above. For the polymerization assay, actin was incubated with 1  
478 mM GJA1-20k protein before polymerization. The changes in fluorescence were measured in  
479 microplate reader (FlexStation 3, Molecular Devices, San Jose, CA) at excitation wavelength  
480 365 nm and emission wavelength 407 nm. The data was obtained from duplicate or triplicate  
481 experimental repeats.

482

### 483 **Seahorse mitochondrial respiration assay**

484 The mitochondrial oxygen consumption rate (OCR) was measured using Seahorse XF96  
485 analyzer (Agilent, Santa Clara, CA) following the manufacturer protocol and previous study  
486 (Zhang et al., 2012). Isolated mouse neonatal cardiomyocytes (CM) described above ( $8.0 \times 10^4$   
487 cells/well) or GST- or GJA1-20k-transfected HEK293 cells ( $1.0 \times 10^4$  cells/well) were seeded  
488 into Seahorse XF96 plate. Before seeding neonatal CM, the plate was coated by laminin (20  
489 µg/ml). After 1 (HEK293) or 2 days (neonatal CM) incubation at 37 °C, OCR was measured in  
490 three time points after injection of oligomycin (2 µM for neonatal CM; 1 µM for HEK293),

491 carbonyl cyanide 4-(trifluoromethoxy)phenylhydrazone (FCCP; 5  $\mu$ M for neonatal CM; 1.5  $\mu$ M  
492 for HEK293), and rotenone/antimycin A (R/A; 1  $\mu$ M each for both neonatal CM and HEK293).  
493 The data was normalized by protein concentration in each well. The maximum respiration was  
494 calculated by subtracting the third measurement point of R/A treatment from that of FCCP  
495 treatment.

496

#### 497 **Mitochondrial ROS measurement**

498 The cells were harvested in 35 mm glass-bottomed dish and transfected plasmid as described  
499 above. The samples were treated with H<sub>2</sub>O<sub>2</sub> (600  $\mu$ M, Sigma-Aldrich) or PBS as control diluted  
500 in culture medium for 30 minutes at 37 °C followed by MitoSOX Red Mitochondrial Superoxide  
501 Indicator (5  $\mu$ M, Thermo Fisher Scientific) for 10 minutes at 37 °C. After the incubation, the  
502 samples were subjected to live cell imaging. The intensity of MitoSOX was calculated using the  
503 formula; Total cell intensity – (Area of the cell  $\times$  Mean intensity of background).

504

#### 505 **Langendorff-perfused mouse heart I/R injury**

506 Adult (14- to 16-week-old) male WT or Gja1<sup>M213L/WT</sup> mice were used for I/R study, as previously  
507 described (Basheer et al., 2018) with some modifications. Briefly, mice were injected with 100 U  
508 (IP) of heparin 20 minutes prior to IP administration of sodium pentobarbital (200 mg/kg) and  
509 hearts were removed quickly by a midsternal incision and placed into ice-cold modified pH 7.4  
510 Krebs-Henseleit (K-H) solution. Then, the heart was attached to Langendorff apparatus, and  
511 perfused through the aorta at a constant rate 2.5 ml/min with the Krebs-Henseleit (K-H) solution  
512 (pH 7.4) gassed with 95% O<sub>2</sub>/5% CO<sub>2</sub> constantly. The K-H solution temperature was maintained  
513 at 37 °C by circulating water bath. After 20 minutes equilibration to achieve a steady state, the

514 hearts were subjected to 30 minutes of ischemia (no-flow ischemia) followed by 60 minutes of  
515 reperfusion. During ischemia, the hearts were immersed in warm K-H solution. After  
516 reperfusion, the hearts were sliced in 1 mm thickness and immersed in freshly made 1%  
517 triphenyl tetrazolium chloride (TTC) solution for 20 minutes at 37 °C followed by fixation with  
518 4% paraformaldehyde for 30 minutes. Scanned image was analyzed using Image J (NIH). The  
519 area of the infarcted region of each slice was measured by semiautomatic threshold color setting,  
520 and expressed as a percentage of the total slice area. Infarct size was corrected to the weight of  
521 each slice as previously described (Basheer et al., 2018).

522

### 523 **Mitochondrial DNA copy number analysis**

524 Total DNA was extracted using NucleoSpin Tissue (MACHEREY-NAGEL, Düren, Germany)  
525 from the mouse hearts or the cells cultured in 6-well plate following manufacturer protocol. The  
526 DNA concentration was measured using NanoDrop 2000 (Thermo Fisher Scientific) and 5 ng/ $\mu$ l  
527 of DNA was subjected to Real-Time PCR analysis (Bio-Rad) using Mouse Mitochondrial DNA  
528 Copy Number Assay kit (Detroit R&D, Detroit, MI) for the samples from the mouse heart or  
529 Human Mitochondrial DNA Monitoring Primer Set (TaKaRa Bio) for the cells following  
530 manufacturer protocol.

531

### 532 **Statistical analysis**

533 Graphs were created and analyzed using Prism 6 software (GraphPad). For two groups  
534 comparison, unpaired two-tail Mann-Whitney U-test was performed. For among multiple group  
535 comparison, Kruskal-Wallis test with Dunn's post-hoc test or two-way ANOVA with



536 Bonferroni's post-hoc test was performed. p values of less than 0.05 was considered significant.

537 All data points, exact p values, and statistical data are provided in the source data.

538

### 539 **Acknowledgements**

540 We acknowledge W. Basheer and D. Hernandez for the technical discussion, S. Ryazantsev and

541 L. Nikolova for electron microscopy, A. Laxman for Seahorse analysis. J.R. is an Investigator of

542 the Howard Hughes Medical Institute.

543

### 544 **Competing interests**

545 The authors declare no competing interests.

546

### 547 **References**

548 Andersen, K. R., Leksa, N. C. & Schwartz, T. U. (2013) Optimized E. coli expression strain

549 LOBSTR eliminates common contaminants from His-tag purification. *Proteins*, 81,

550 1857-61.10.1002/prot.24364

551 Atar, D., Arheden, H., Berdeaux, A., Bonnet, J. L., Carlsson, M., Clemmensen, P., Cuvier, V.,

552 Danchin, N., Dubois-Rande, J. L., Engblom, H., Erlinge, D., Firat, H., Halvorsen, S.,

553 Hansen, H. S., Hauke, W., Heiberg, E., Koul, S., Larsen, A. I., Le Corvoisier, P.,

554 Nordrehaug, J. E., Paganelli, F., Pruss, R. M., Rousseau, H., Schaller, S., Sonou, G.,

555 Tuset, V., Veys, J., Vicaut, E. & Jensen, S. E. (2015) Effect of intravenous TRO40303

556 as an adjunct to primary percutaneous coronary intervention for acute ST-elevation

557 myocardial infarction: MITOCARE study results. *Eur Heart J*, 36, 112-

558 9.10.1093/eurheartj/ehu331

- 559 Basheer, W. A., Fu, Y., Shimura, D., Xiao, S., Agvanian, S., Hernandez, D. M., Hitzeman, T. C.,  
560 Hong, T. & Shaw, R. M. (2018) Stress response protein GJA1-20k promotes  
561 mitochondrial biogenesis, metabolic quiescence, and cardioprotection against  
562 ischemia/reperfusion injury. *JCI Insight*, 3.10.1172/jci.insight.121900
- 563 Basheer, W. A., Xiao, S., Epifantseva, I., Fu, Y., Kleber, A. G., Hong, T. & Shaw, R. M. (2017)  
564 GJA1-20k Arranges Actin to Guide Cx43 Delivery to Cardiac Intercalated Discs. *Circ*  
565 *Res*, 121, 1069-1080.10.1161/CIRCRESAHA.117.311955
- 566 Blanchoin, L., Boujemaa-Paterski, R., Sykes, C. & Plastino, J. (2014) Actin dynamics,  
567 architecture, and mechanics in cell motility. *Physiol Rev*, 94, 235-  
568 63.10.1152/physrev.00018.2013
- 569 Borgers, M. (2002) Hibernating myocardium: Programmed cell survival or programmed cell  
570 death? *Exp Clin Cardiol*, 7, 69-72
- 571 Borgers, M., Thone, F., Wouters, L., Ausma, J., Shivalkar, B. & Flameng, W. (1993) Structural  
572 Correlates of Regional Myocardial Dysfunction in Patients with Critical Coronary-Artery  
573 Stenosis - Chronic Hibernation. *Cardiovascular Pathology*, 2, 237-245. Doi  
574 10.1016/1054-8807(93)90030-6
- 575 Burman, J. L., Pickles, S., Wang, C., Sekine, S., Vargas, J. N. S., Zhang, Z., Youle, A. M.,  
576 Nezich, C. L., Wu, X., Hammer, J. A. & Youle, R. J. (2017) Mitochondrial fission  
577 facilitates the selective mitophagy of protein aggregates. *J Cell Biol*, 216, 3231-  
578 3247.10.1083/jcb.201612106
- 579 Chan, D. C. (2006) Mitochondria: dynamic organelles in disease, aging, and development. *Cell*,  
580 125, 1241-52.10.1016/j.cell.2006.06.010

- 581 Coronado, M., Fajardo, G., Nguyen, K., Zhao, M., Kooiker, K., Jung, G., Hu, D. Q., Reddy, S.,  
582 Sandoval, E., Stotland, A., Gottlieb, R. A. & Bernstein, D. (2018) Physiological  
583 Mitochondrial Fragmentation Is a Normal Cardiac Adaptation to Increased Energy  
584 Demand. *Circ Res*, 122, 282-295.10.1161/CIRCRESAHA.117.310725
- 585 Cung, T. T., Morel, O., Cayla, G., Rioufol, G., Garcia-Dorado, D., Angoulvant, D., Bonnefoy-  
586 Cudraz, E., Guerin, P., Elbaz, M., Delarche, N., Coste, P., Vanzetto, G., Metge, M.,  
587 Aupetit, J. F., Jouve, B., Motreff, P., Tron, C., Labeque, J. N., Steg, P. G., Cottin, Y.,  
588 Range, G., Clerc, J., Claeys, M. J., Coussement, P., Prunier, F., Moulin, F., Roth, O.,  
589 Belle, L., Dubois, P., Barragan, P., Gilard, M., Piot, C., Colin, P., De Poli, F., Morice, M.  
590 C., Ider, O., Dubois-Rande, J. L., Untersee, T., Le Breton, H., Beard, T., Blanchard, D.,  
591 Grollier, G., Malquarti, V., Staat, P., Sudre, A., Elmer, E., Hansson, M. J., Bergerot, C.,  
592 Boussaha, I., Jossan, C., Derumeaux, G., Mewton, N. & Ovize, M. (2015) Cyclosporine  
593 before PCI in Patients with Acute Myocardial Infarction. *N Engl J Med*, 373, 1021-  
594 31.10.1056/NEJMoa1505489
- 595 Dagda, R. K., Cherra, S. J., 3rd, Kulich, S. M., Tandon, A., Park, D. & Chu, C. T. (2009) Loss of  
596 PINK1 function promotes mitophagy through effects on oxidative stress and  
597 mitochondrial fission. *J Biol Chem*, 284, 13843-55.10.1074/jbc.M808515200
- 598 Dragasis, S., Bassiakou, E., Iacovidou, N., Papadimitriou, L., Andreas Steen, P., Gulati, A. &  
599 Xanthos, T. (2013) The role of opioid receptor agonists in ischemic preconditioning. *Eur*  
600 *J Pharmacol*, 720, 401-8.10.1016/j.ejphar.2013.10.001
- 601 Friedman, J. R. & Nunnari, J. (2014) Mitochondrial form and function. *Nature*, 505, 335-  
602 43.10.1038/nature12985

- 603 Fu, Y., Zhang, S. S., Xiao, S., Basheer, W. A., Baum, R., Epifantseva, I., Hong, T. & Shaw, R.  
604 M. (2017) Cx43 Isoform GJA1-20k Promotes Microtubule Dependent Mitochondrial  
605 Transport. *Front Physiol*, 8, 905.10.3389/fphys.2017.00905
- 606 Fu, Y. L., Tao, L., Peng, F. H., Zheng, N. Z., Lin, Q., Cai, S. Y. & Wang, Q. (2020) GJA1-20k  
607 attenuates Ang II-induced pathological cardiac hypertrophy by regulating gap junction  
608 formation and mitochondrial function. *Acta Pharmacol Sin*.10.1038/s41401-020-0459-6
- 609 Fujiwara, I., Zweifel, M. E., Courtemanche, N. & Pollard, T. D. (2018) Latrunculin A  
610 Accelerates Actin Filament Depolymerization in Addition to Sequestering Actin  
611 Monomers. *Curr Biol*, 28, 3183-3192 e2.10.1016/j.cub.2018.07.082
- 612 Garcia-Dorado, D., Rodriguez-Sinovas, A., Ruiz-Meana, M., Inserte, J., Agullo, L. &  
613 Cabestrero, A. (2006) The end-effectors of preconditioning protection against myocardial  
614 cell death secondary to ischemia-reperfusion. *Cardiovasc Res*, 70, 274-  
615 85.10.1016/j.cardiores.2006.02.011
- 616 Garlid, K. D., Costa, A. D., Quinlan, C. L., Pierre, S. V. & Dos Santos, P. (2009)  
617 Cardioprotective signaling to mitochondria. *J Mol Cell Cardiol*, 46, 858-  
618 66.10.1016/j.yjmcc.2008.11.019
- 619 Gibson, C. M., Giugliano, R. P., Kloner, R. A., Bode, C., Tendera, M., Janosi, A., Merkely, B.,  
620 Godlewski, J., Halaby, R., Korjian, S., Daaboul, Y., Chakrabarti, A. K., Spielman, K.,  
621 Neal, B. J. & Weaver, W. D. (2016) EMBRACE STEMI study: a Phase 2a trial to  
622 evaluate the safety, tolerability, and efficacy of intravenous MTP-131 on reperfusion  
623 injury in patients undergoing primary percutaneous coronary intervention. *Eur Heart J*,  
624 37, 1296-303.10.1093/eurheartj/ehv597

- 625 Hatch, A. L., Gurel, P. S. & Higgs, H. N. (2014) Novel roles for actin in mitochondrial fission. *J*  
626 *Cell Sci*, 127, 4549-60.10.1242/jcs.153791
- 627 Heinzl, F. R., Luo, Y., Li, X., Boengler, K., Buechert, A., Garcia-Dorado, D., Di Lisa, F.,  
628 Schulz, R. & Heusch, G. (2005) Impairment of diazoxide-induced formation of reactive  
629 oxygen species and loss of cardioprotection in connexin 43 deficient mice. *Circ Res*, 97,  
630 583-6.10.1161/01.RES.0000181171.65293.65
- 631 Heusch, G. & Gersh, B. J. (2017) The pathophysiology of acute myocardial infarction and  
632 strategies of protection beyond reperfusion: a continual challenge. *Eur Heart J*, 38, 774-  
633 784.10.1093/eurheartj/ehw224
- 634 Heusch, G. & Gersh, B. J. (2020) Is Cardioprotection Salvageable? *Circulation*, 141, 415-  
635 417.10.1161/CIRCULATIONAHA.119.044176
- 636 Heusch, G., Musiolik, J., Gedik, N. & Skyschally, A. (2011) Mitochondrial STAT3 activation  
637 and cardioprotection by ischemic postconditioning in pigs with regional myocardial  
638 ischemia/reperfusion. *Circ Res*, 109, 1302-8.10.1161/CIRCRESAHA.111.255604
- 639 Hu, C., Huang, Y. & Li, L. (2017) Drp1-Dependent Mitochondrial Fission Plays Critical Roles  
640 in Physiological and Pathological Progresses in Mammals. *Int J Mol Sci*,  
641 18.10.3390/ijms18010144
- 642 Ikeda, Y., Shirakabe, A., Maejima, Y., Zhai, P., Sciarretta, S., Toli, J., Nomura, M., Mihara, K.,  
643 Egashira, K., Ohishi, M., Abdellatif, M. & Sadoshima, J. (2015) Endogenous Drp1  
644 mediates mitochondrial autophagy and protects the heart against energy stress. *Circ Res*,  
645 116, 264-78.10.1161/CIRCRESAHA.116.303356

- 646 Ji, W. K., Hatch, A. L., Merrill, R. A., Strack, S. & Higgs, H. N. (2015) Actin filaments target  
647 the oligomeric maturation of the dynamin GTPase Drp1 to mitochondrial fission sites.  
648 *Elife*, 4, e11553.10.7554/eLife.11553
- 649 Juhaszova, M., Zorov, D. B., Kim, S. H., Pepe, S., Fu, Q., Fishbein, K. W., Ziman, B. D., Wang,  
650 S., Ytrehus, K., Antos, C. L., Olson, E. N. & Sollott, S. J. (2004) Glycogen synthase  
651 kinase-3beta mediates convergence of protection signaling to inhibit the mitochondrial  
652 permeability transition pore. *J Clin Invest*, 113, 1535-49.10.1172/JCI19906
- 653 Korobova, F., Ramabhadran, V. & Higgs, H. N. (2013) An actin-dependent step in mitochondrial  
654 fission mediated by the ER-associated formin INF2. *Science*, 339, 464-  
655 7.10.1126/science.1228360
- 656 Li, G. B., Zhang, H. W., Fu, R. Q., Hu, X. Y., Liu, L., Li, Y. N., Liu, Y. X., Liu, X., Hu, J. J.,  
657 Deng, Q., Luo, Q. S., Zhang, R. & Gao, N. (2018) Mitochondrial fission and mitophagy  
658 depend on cofilin-mediated actin depolymerization activity at the mitochondrial fission  
659 site. *Oncogene*, 37, 1485-1502.10.1038/s41388-017-0064-4
- 660 Moore, A. S., Wong, Y. C., Simpson, C. L. & Holzbaur, E. L. (2016) Dynamic actin cycling  
661 through mitochondrial subpopulations locally regulates the fission-fusion balance within  
662 mitochondrial networks. *Nat Commun*, 7, 12886.10.1038/ncomms12886
- 663 Murry, C. E., Jennings, R. B. & Reimer, K. A. (1986) Preconditioning with ischemia: a delay of  
664 lethal cell injury in ischemic myocardium. *Circulation*, 74, 1124-  
665 36.10.1161/01.cir.74.5.1124
- 666 Nishimura, A., Shimauchi, T., Tanaka, T., Shimoda, K., Toyama, T., Kitajima, N., Ishikawa, T.,  
667 Shindo, N., Numaga-Tomita, T., Yasuda, S., Sato, Y., Kuwahara, K., Kumagai, Y.,  
668 Akaike, T., Ide, T., Ojida, A., Mori, Y. & Nishida, M. (2018) Hypoxia-induced

- 669 interaction of filamin with Drp1 causes mitochondrial hyperfission-associated myocardial  
670 senescence. *Sci Signal*, 11.10.1126/scisignal.aat5185
- 671 Nunnari, J. & Suomalainen, A. (2012) Mitochondria: in sickness and in health. *Cell*, 148, 1145-  
672 59.10.1016/j.cell.2012.02.035
- 673 Picard, M., Shirihai, O. S., Gentil, B. J. & Burelle, Y. (2013) Mitochondrial morphology  
674 transitions and functions: implications for retrograde signaling? *Am J Physiol Regul*  
675 *Integr Comp Physiol*, 304, R393-406.10.1152/ajpregu.00584.2012
- 676 Ren, D., Zheng, P., Feng, J., Gong, Y., Wang, Y., Duan, J., Zhao, L., Deng, J., Chen, H., Zou, S.,  
677 Hong, T. & Chen, W. (2020) Overexpression of Astrocytes-Specific GJA1-20k Enhances  
678 the Viability and Recovery of the Neurons in a Rat Model of Traumatic Brain Injury.  
679 *ACS Chem Neurosci*, 11, 1643-1650.10.1021/acscemneuro.0c00142
- 680 Rodriguez-Sinovas, A., Ruiz-Meana, M., Denuc, A. & Garcia-Dorado, D. (2018) Mitochondrial  
681 Cx43, an important component of cardiac preconditioning. *Biochim Biophys Acta*  
682 *Biomembr*, 1860, 174-181.10.1016/j.bbamem.2017.06.011
- 683 Sabouny, R. & Shutt, T. E. (2020) Reciprocal Regulation of Mitochondrial Fission and Fusion.  
684 *Trends Biochem Sci*, 45, 564-577.10.1016/j.tibs.2020.03.009
- 685 Salat-Canela, C., Sese, M., Peula, C., Ramon y Cajal, S. & Aasen, T. (2014) Internal translation  
686 of the connexin 43 transcript. *Cell Commun Signal*, 12, 31.10.1186/1478-811X-12-31
- 687 Schaller, S., Paradis, S., Ngoh, G. A., Assaly, R., Buisson, B., Drouot, C., Ostuni, M. A.,  
688 Lacapere, J. J., Bassissi, F., Bordet, T., Berdeaux, A., Jones, S. P., Morin, D. & Pruss, R.  
689 M. (2010) TRO40303, a new cardioprotective compound, inhibits mitochondrial  
690 permeability transition. *J Pharmacol Exp Ther*, 333, 696-706.10.1124/jpet.110.167486

- 691 Schrepfer, E. & Scorrano, L. (2016) Mitofusins, from Mitochondria to Metabolism. *Mol Cell*, 61,  
692 683-694.10.1016/j.molcel.2016.02.022
- 693 Schulz, R., Gorge, P. M., Gorbe, A., Ferdinandy, P., Lampe, P. D. & Leybaert, L. (2015)  
694 Connexin 43 is an emerging therapeutic target in ischemia/reperfusion injury,  
695 cardioprotection and neuroprotection. *Pharmacol Ther*, 153, 90-  
696 106.10.1016/j.pharmthera.2015.06.005
- 697 Shirakabe, A., Zhai, P., Ikeda, Y., Saito, T., Maejima, Y., Hsu, C. P., Nomura, M., Egashira, K.,  
698 Levine, B. & Sadoshima, J. (2016) Drp1-Dependent Mitochondrial Autophagy Plays a  
699 Protective Role Against Pressure Overload-Induced Mitochondrial Dysfunction and  
700 Heart Failure. *Circulation*, 133, 1249-63.10.1161/CIRCULATIONAHA.115.020502
- 701 Smyth, J. W. & Shaw, R. M. (2013) Autoregulation of connexin43 gap junction formation by  
702 internally translated isoforms. *Cell Rep*, 5, 611-8.10.1016/j.celrep.2013.10.009
- 703 Song, M., Mihara, K., Chen, Y., Scorrano, L. & Dorn, G. W., 2nd (2015) Mitochondrial fission  
704 and fusion factors reciprocally orchestrate mitophagic culling in mouse hearts and  
705 cultured fibroblasts. *Cell Metab*, 21, 273-286.10.1016/j.cmet.2014.12.011
- 706 Sprenger, H. G. & Langer, T. (2019) The Good and the Bad of Mitochondrial Breakups. *Trends*  
707 *Cell Biol*, 29, 888-900.10.1016/j.tcb.2019.08.003
- 708 Stavru, F., Palmer, A. E., Wang, C., Youle, R. J. & Cossart, P. (2013) Atypical mitochondrial  
709 fission upon bacterial infection. *Proc Natl Acad Sci U S A*, 110, 16003-  
710 8.10.1073/pnas.1315784110
- 711 Suen, D. F., Norris, K. L. & Youle, R. J. (2008) Mitochondrial dynamics and apoptosis. *Genes*  
712 *Dev*, 22, 1577-90.10.1101/gad.1658508



- 713 Ul-Hussain, M., Olk, S., Schoenebeck, B., Wasielewski, B., Meier, C., Prochnow, N., May, C.,  
714 Galozzi, S., Marcus, K., Zoidl, G. & Dermietzel, R. (2014) Internal ribosomal entry site  
715 (IRES) activity generates endogenous carboxyl-terminal domains of Cx43 and is  
716 responsive to hypoxic conditions. *J Biol Chem*, 289, 20979-90.10.1074/jbc.M113.540187
- 717 Wai, T. & Langer, T. (2016) Mitochondrial Dynamics and Metabolic Regulation. *Trends*  
718 *Endocrinol Metab*, 27, 105-117.10.1016/j.tem.2015.12.001
- 719 Wang, M., Smith, K., Yu, Q., Miller, C., Singh, K. & Sen, C. K. (2019) Mitochondrial connexin  
720 43 in sex-dependent myocardial responses and estrogen-mediated cardiac protection  
721 following acute ischemia/reperfusion injury. *Basic Res Cardiol*, 115, 1.10.1007/s00395-  
722 019-0759-5
- 723 Wang, Y., Subramanian, M., Yurdagul, A., Jr., Barbosa-Lorenzi, V. C., Cai, B., de Juan-Sanz, J.,  
724 Ryan, T. A., Nomura, M., Maxfield, F. R. & Tabas, I. (2017) Mitochondrial Fission  
725 Promotes the Continued Clearance of Apoptotic Cells by Macrophages. *Cell*, 171, 331-  
726 345 e22.10.1016/j.cell.2017.08.041
- 727 Xiao, S., Shimura, D., Baum, R., Hernandez, D. M., Agvanian, S., Nagaoka, Y., Katsumata, M.,  
728 Lampe, P. D., Kleber, A. G., Hong, T. & Shaw, R. M. (2020) Auxiliary trafficking  
729 subunit GJA1-20k protects Connexin43 from degradation and limits ventricular  
730 arrhythmias. *J Clin Invest*.10.1172/JCI134682
- 731 Yamashita, S. I., Jin, X., Furukawa, K., Hamasaki, M., Nezu, A., Otera, H., Saigusa, T.,  
732 Yoshimori, T., Sakai, Y., Mihara, K. & Kanki, T. (2016) Mitochondrial division occurs  
733 concurrently with autophagosome formation but independently of Drp1 during  
734 mitophagy. *J Cell Biol*, 215, 649-665.10.1083/jcb.201605093

- 735 Youle, R. J. & van der Bliek, A. M. (2012) Mitochondrial fission, fusion, and stress. *Science*,  
736 337, 1062-5.10.1126/science.1219855
- 737 Zhang, J., Nuebel, E., Wisidagama, D. R., Setoguchi, K., Hong, J. S., Van Horn, C. M., Imam, S.  
738 S., Vergnes, L., Malone, C. S., Koehler, C. M. & Teitell, M. A. (2012) Measuring energy  
739 metabolism in cultured cells, including human pluripotent stem cells and differentiated  
740 cells. *Nat Protoc*, 7, 1068-85.10.1038/nprot.2012.048

741

742

743 **Figure legends**

744 **Figure 1. GJA1-20k decreases in mitochondrial size.**

745 (A)–(C) Representative live cell images of mitochondria in HEK293 (A, GST- or GJA1-20k-  
746 transfected; B, Control and siGja1) and mouse neonatal cardiomyocytes (C, WT, GJA1-20k-  
747 transduced, and Gja1<sup>M213L/M213L</sup>). The right-most panels are magnified images. (D) and (E)  
748 Representative EM images from young mouse hearts (D, WT or Gja1<sup>M213L/M213L</sup>) and adult  
749 mouse hearts (E, GST- or GJA1-20k-injected). (F) Summary of the fold change in the average  
750 area of mitochondria. (n = 51 (GST), 67 (GJA1-20k), 52 (Control), or 57 (siGja1) HEK293 cells  
751 from five independent experiments; n = 46 (WT), 47 (GJA1-20k), or 48 (Gja1<sup>M213L/M213L</sup>) cells  
752 from 4 hearts; n = 84 (WT) or 91 (Gja1<sup>M213L/M213L</sup>) images from 6 hearts; n = 25 (GST), or 28  
753 (GJA1-20k) images from 3 hearts. Graphs were expressed as mean ± SD (HEK293) or ± SEM  
754 (mouse). p values were determined by two-tailed Mann-Whitney U-test or Kruskal-Wallis test  
755 with Dunn's post-hoc test. \*\*p < 0.01, \*\*\*p < 0.001. Scale bars, 10 μm and 5 μm in magnified  
756 (A–C); 2 μm (D and E). Exact p values and statistical data are provided in the source data.

757

758 **Figure 2. DRP1 is not involved in GJA1-20k mediated mitochondrial fission.**

759 (A) and (B), Western blot analysis for mitochondrial dynamics related proteins. Transfection was  
760 confirmed by GFP bands and the band size difference in GFP is due to the difference in  
761 molecular weight between GST and GJA1-20k (A). Tubulin was used as internal loading control.  
762 n = 5 independent experimental repeats. (C) and (E) Representative fixed cell images of  
763 mitochondria (visualized by Tom20) with or without Mdivi-1 (C) or DRP1 siRNA treatment (E).  
764 (D) and (F) The fold change in the average area of mitochondria in each treatment. n = 32 (GST,  
765 DMSO), 33 (GJA1-20k, DMSO), or 29 (GST or GJA1-20k, Mdivi-1) cells (D); n = 34 (GST,

766 control siRNA), 32 (GJA1-20k, control siRNA), 36 (GST, DRP1 siRNA), or 31 (GJA1-20k,  
767 DRP1 siRNA) cells (**F**) from three independent experiments. Graphs were expressed as mean  $\pm$   
768 SD. p values were determined by two-tailed Mann-Whitney U-test or two-way ANOVA with  
769 Bonferroni's post-hoc test. \*\*\*p < 0.001; n.s., not significant. Scale bars, 5  $\mu$ m (**C** and **E**). Exact  
770 p values and statistical data are provided in the source data.

771

772 **Figure 3. GJA1-20k stabilizes and recruits actin around mitochondria for fission.**

773 (**A**) Representative live cell images of mitochondria with or without GJA1-20k. Actin was  
774 labeled by co-transfection with lifeAct-mCherry. The right-most panels indicate magnified  
775 images. (**B**) and (**C**) Western blot analysis in cytosol or mitochondrial fraction. MEK1/2 was  
776 used as cytosol marker and Tom20 and COX IV as mitochondrial markers (**B**). Quantification of  
777 actin in mitochondrial fraction normalized by Tom20 expression (**C**). n = 4 independent  
778 experimental repeats. (**D**) and (**E**) Cell-free actin polymerization (**D**) and depolymerization (**E**)  
779 assay. (**F**) Representative fixed cell images of mitochondria (visualized by Tom20) with or  
780 without LatA. (**G**) The fold change in the average area of mitochondria with or without LatA  
781 treatment. n = 32 (GST, DMSO), 33 (GST, LatA), 28 (GJA1-20k, DMSO), or 32 (GJA1-20k,  
782 LatA) cells from three independent experiments. Graphs were expressed as mean  $\pm$  SD. p values  
783 were determined by two-tailed Mann-Whitney U-test or two-way ANOVA with Bonferroni's  
784 post-hoc test. \*p < 0.05, \*\*\*p < 0.001; n.s., not significant. Scale bars, 10  $\mu$ m (**F**), 5  $\mu$ m (**A** and  
785 magnified in **F**) and 2  $\mu$ m (magnified in **A**). Exact p values and statistical data are provided in  
786 the source data.

787

788 **Figure 4. Time course of mitochondria dynamics and actin accumulation at the**  
789 **mitochondrial fission site under Mdivi-1 treatment.**

790 (A) and (C) Representative mitochondrial dynamics in GJA1-20k-transfected cells by time-lapse  
791 live cell imaging under Mdivi-1 treatment. The bottom images (with fire look-up table) indicate  
792 the product of GJA1-20k and actin signals. The white lines indicate mitochondrial outlines. Scale  
793 bars, 2  $\mu$ m. (B) and (D) The intensity of mitochondria and the product of GJA1-20k and actin  
794 from (A) and (C), respectively. The colored areas indicate fission sites along the lines shown in  
795 each respective insert. (E)–(G) The time course of the product of GJA1-20k and actin intensity  
796 (E), mitochondrial intensity (F), or combined relative intensity (G) at the fission site from the  
797 mitochondrion shown in (A). Curves are four parameter logistic (4PL) fits to the data. Time 0  
798 corresponds to the peak product of actin and GJA1-20k intensity. The arrows indicate the time  
799 point at which fission is complete. (H) Measured time from peak product of actin and GJA1-20k  
800 intensity to fission in seconds (bars indicate median and 95% confidence interval). n = 29 events.  
801 All data points are provided in the source data.

802

803 **Figure 5. Mitochondrial metabolic function is preserved by GJA1-20k.**

804 (A)–(D) Real-time change in OCR by Seahorse assay and the maximum respiration in HEK293  
805 cells (A and B) and mouse neonatal CM (C and D). 7 (GST) or 8 (GJA1-20k) replicates from  
806 HEK293 cells; n = 24 (WT from 4 hearts) or 16 (Gja1<sup>M213L/M213L</sup> from 3 hearts) replicates. (E)  
807 Representative live cell images of MitoSOX with or without H<sub>2</sub>O<sub>2</sub> treatment to GST- or GJA1-  
808 20k-transfected HEK293 cells. (F) Relative intensity of MitoSOX. n = 39 (GST, PBS), 41 (GST,  
809 H<sub>2</sub>O<sub>2</sub>), or 37 (GJA1-20k, PBS or H<sub>2</sub>O<sub>2</sub>) cells from three independent experiments. (G)  
810 Representative images of TTC stained hearts from WT and Gja1<sup>M213L/WT</sup> mice after I/R. (H)

811 Quantification of infarct size after I/R.  $n = 4$ . Graphs were expressed as mean  $\pm$  SD (HEK293) or  
812 SEM (mouse).  $p$  values were determined by two-tailed Mann-Whitney U-test or two-way  
813 ANOVA with Bonferroni's post-hoc test.  $*p < 0.05$ ,  $***p < 0.001$ ; n.s., not significant. Scale  
814 bars, 10  $\mu\text{m}$  (**E**); 5 mm (**G**). Exact  $p$  values and statistical data are provided in the source data.

815

816 **Figure 6. Schematic summary.**

817 GJA1-20k, internally translated from Gja1 mRNA, localizes mitochondria membrane, stabilizes  
818 actin cytoskeleton, and recruits actin around mitochondria to both induce mitochondrial fission  
819 and achieve oxidative stress resistance.

820

821 **Movie 1. GJA1-20k assembles actin to mitochondrial fission sites and causes fission (clip 1).**

822 The mitochondrial fission in GJA1-20k-transfected HEK293 cells was monitored under Mdivi-1  
823 treatment. GJA1-20k (tagged with GFP, green) and mitochondria (indicated by Mitotracker,  
824 blue) were simultaneously imaged (left panel), as were mitochondria and actin (indicated by  
825 LifeAct-mCherry, red) (middle panel). The spatial coincidence of GJA1-20k and actin were  
826 obtained by multiplying GJA1-20k signal with mitochondrial signal, as indicate with a  
827 polychromatic fire lookup table (right panel). Note GJA1-20k then actin surround the  
828 mitochondria, assembles at the neck of fission site, resulting in fission. The white arrowhead  
829 indicates the fission point. Images for each timepoint were obtained every 3 seconds. There are  
830 26 images for a 78 second clip, played back at 5 frames per second (about 15 times as fast as real  
831 time). Still frames are indicated in Figure 4A.

832

833

834 **Movie 2. GJA1-20k assembles actin to mitochondrial fission sites and causes fission (clip 2).**

835 The mitochondrial fission in GJA1-20k-transfected HEK293 cells was monitored under Mdivi-1  
836 treatment. GJA1-20k (tagged with GFP, green) and mitochondria (indicated by Mitotracker,  
837 blue) were simultaneously imaged (left panel), as were mitochondria and actin (indicated by  
838 LifeAct-mCherry, red) (middle panel). The spatial coincidence of GJA1-20k and actin were  
839 obtained by multiplying GJA1-20k signal with mitochondrial signal, as indicate with a  
840 polychromatic fire lookup table (right panel). Note GJA1-20k then actin surround the  
841 mitochondria, assembles at the neck of fission site, resulting in fission. The white arrowhead  
842 indicates the fission point. Images for each timepoint were obtained every 3 seconds. There are  
843 81 images for a 243 second clip, played back at 5 frames per second (about 15 times as fast as  
844 real time). Still frames are indicated in Figure 4C.

845

846 **Figure Supplements**

847 **Figure 1—figure supplement 1**

848 **The confirmation of Gja1 knock-down and the mitochondrial morphology rescued by**  
849 **GJA1-20k.**

850 **(A)** Western blot analysis for Gja1 knock-down by siRNA. Tubulin was used as internal loading  
851 control. n = 3 independent experimental repeats. **(B)** The representative confocal live cell  
852 imaging of Gja1 knocked-down HEK293 cells with Cx43-M6L or GJA1-20k transfection. **(C)**  
853 The fold change in the average area of individual mitochondria. n = 52 (Control), 57 (siGja1), 60  
854 (siGja1 + M6L), or 64 (siGja1 + GJA1-20k) cells from five independent experiments. The  
855 images and the values of Control and siGja1 are also shown in Figure 1. **(D)** The representative  
856 live cell imaging of mitochondria in WT mouse neonatal CMs with adenovirus-mediated GFP

857 induction. The right panel indicates magnified image surrounded by square. **(E)** The fold change  
858 in the average area of individual mitochondria between WT (no virus introduction, the image and  
859 the value shown in Figure 1) and GFP-V5 introduction.  $n = 46$  (WT) or  $35$  (GFP) cells from  $4$   
860 hearts. Graphs were expressed as mean  $\pm$  SD **(C)** or SEM **(E)**.  $p$  values were determined by two-  
861 tailed Mann-Whitney U-test or Kruskal-Wallis test with Dunn's post-hoc test.  $*p < 0.05$ ,  $**p <$   
862  $0.01$ ,  $***p < 0.001$ ; n.s., not significant. Scale bars,  $10 \mu\text{m}$  or  $5 \mu\text{m}$  in magnified image. Exact  $p$   
863 values and statistical data are provided in the source data.

864

### 865 **Figure 2—figure supplement 1**

#### 866 **The confirmation of DRP1 knock-down by siRNA and the mitochondrial morphology** 867 **rescued by GJA1-20k.**

868 **(A)** Western blot analysis for DRP1 knock-down by siRNA.  $n = 3$  independent experimental  
869 repeats. **(B)** and **(C)** The representative fixed cell images of mitochondria (visualized by Tom20)  
870 with or without Mdivi-1 **(B)**, or siDRP1 **(C)** treatment. The magnified mitochondria images  
871 surrounded by the square are used in Figure 2. Scale bars,  $10 \mu\text{m}$  **(B and C)** or  $5 \mu\text{m}$  in magnified  
872 image **(C)**.

873

### 874 **Figure 5—figure supplement 1**

#### 875 **The mitochondria size did not change in adult mouse heart between WT and heterozygous** 876 **Gja1<sup>M213L/WT</sup>.**

877 **(A)** The representative electron microscope images from adult mouse hearts (WT or  
878 Gja1<sup>M213L/WT</sup>). Scale bars,  $2 \mu\text{m}$ . **(B)** The fold change in the average area of individual  
879 mitochondria.  $n = 43$  (WT) or  $46$  (Gja1<sup>M213L/WT</sup>) images from  $3$  hearts. Graph was expressed as



880 mean  $\pm$  SEM. p value was determined by two-tailed Mann-Whitney U-test. n.s., not significant.

881 Exact p values and statistical data are provided in the source data.

882

### 883 **Source Data Legends**

#### 884 **Figure 1—source data 1**

885 **All data points of the mitochondrial size and the statistical data for Figure 1F.**

886

#### 887 **Figure 2—source data 1**

888 **All data points of the protein expression and the mitochondrial size and the statistical data**  
889 **for Figure 2.**

890

#### 891 **Figure 3—source data 1**

892 **All data points of the actin assay and the mitochondrial size and the statistical data for**  
893 **Figure 3.**

894

#### 895 **Figure 4—source data 1**

896 **All data points of the intensity for Figure 4.**

897

#### 898 **Figure 5—source data 1**

899 **All data points of the seahorse assay, ROS intensity, and infarct size and the statistical data**  
900 **for Figure 5.**

# Figure 1

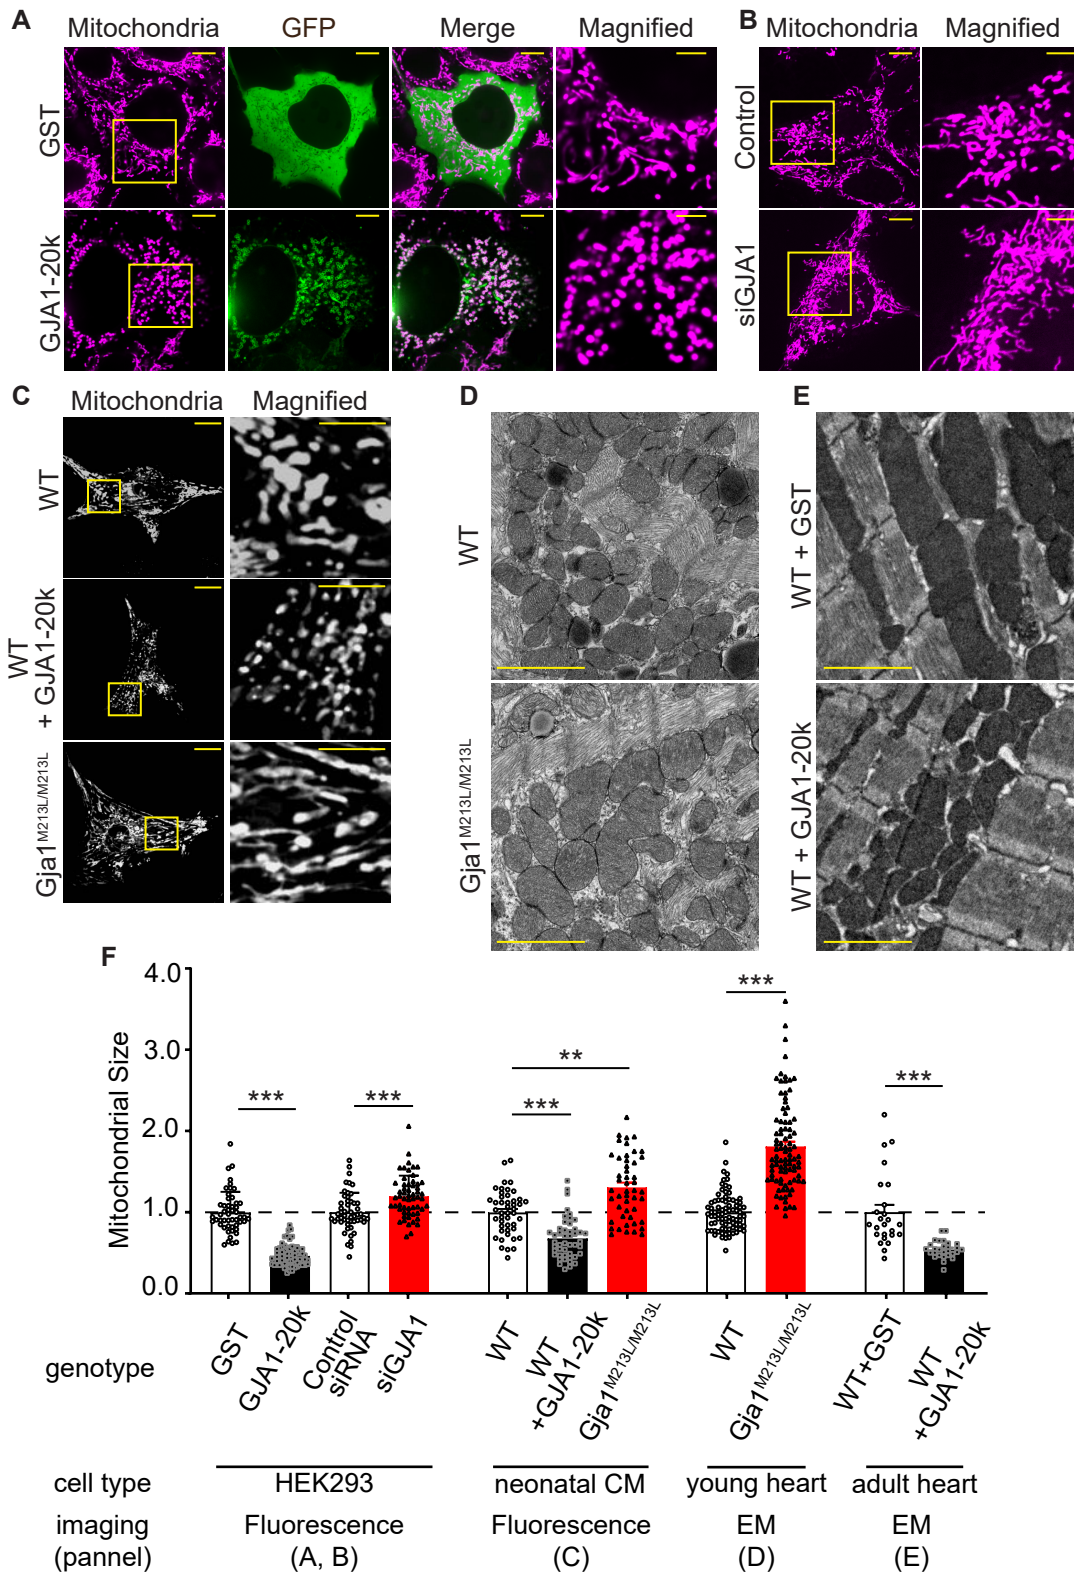

## Figure 1. GJA1-20k decreases in mitochondrial size

(A)–(C) Representative live cell images of mitochondria in HEK293 (A, GST- or GJA1-20k-transfected; B, Control and siGja1) and mouse neonatal cardiomyocytes (C, WT, GJA1-20k-transduced, and Gja1<sup>M213L/M213L</sup>). The right-most panels are magnified images. (D) and (E) Representative EM images from young mouse hearts (D, WT or Gja1<sup>M213L/M213L</sup>) and adult mouse hearts (E, GST- or GJA1-20k-injected). (F) Summary of the fold change in the average area of mitochondria. (n = 51 (GST), 67 (GJA1-20k), 52 (Control), or 57 (siGja1) HEK293 cells from five independent experiments; n = 46 (WT), 47 (GJA1-20k), or 48 (Gja1<sup>M213L/M213L</sup>) cells from 4 hearts; n = 84 (WT) or 91 (Gja1<sup>M213L/M213L</sup>) images from 6 hearts; n = 25 (GST), or 28 (GJA1-20k) images from 3 hearts. Graphs were expressed as mean ± SD (HEK293) or ± SEM (mouse). p values were determined by two-tailed Mann-Whitney U-test or Kruskal-Wallis test with Dunn's post-hoc test. \*\*p < 0.01, \*\*\*p < 0.001. Scale bars, 10 μm and 5 μm in magnified (A–C); 2 μm (D and E). Exact p values and statistical data are provided in the source data.

## Figure 2

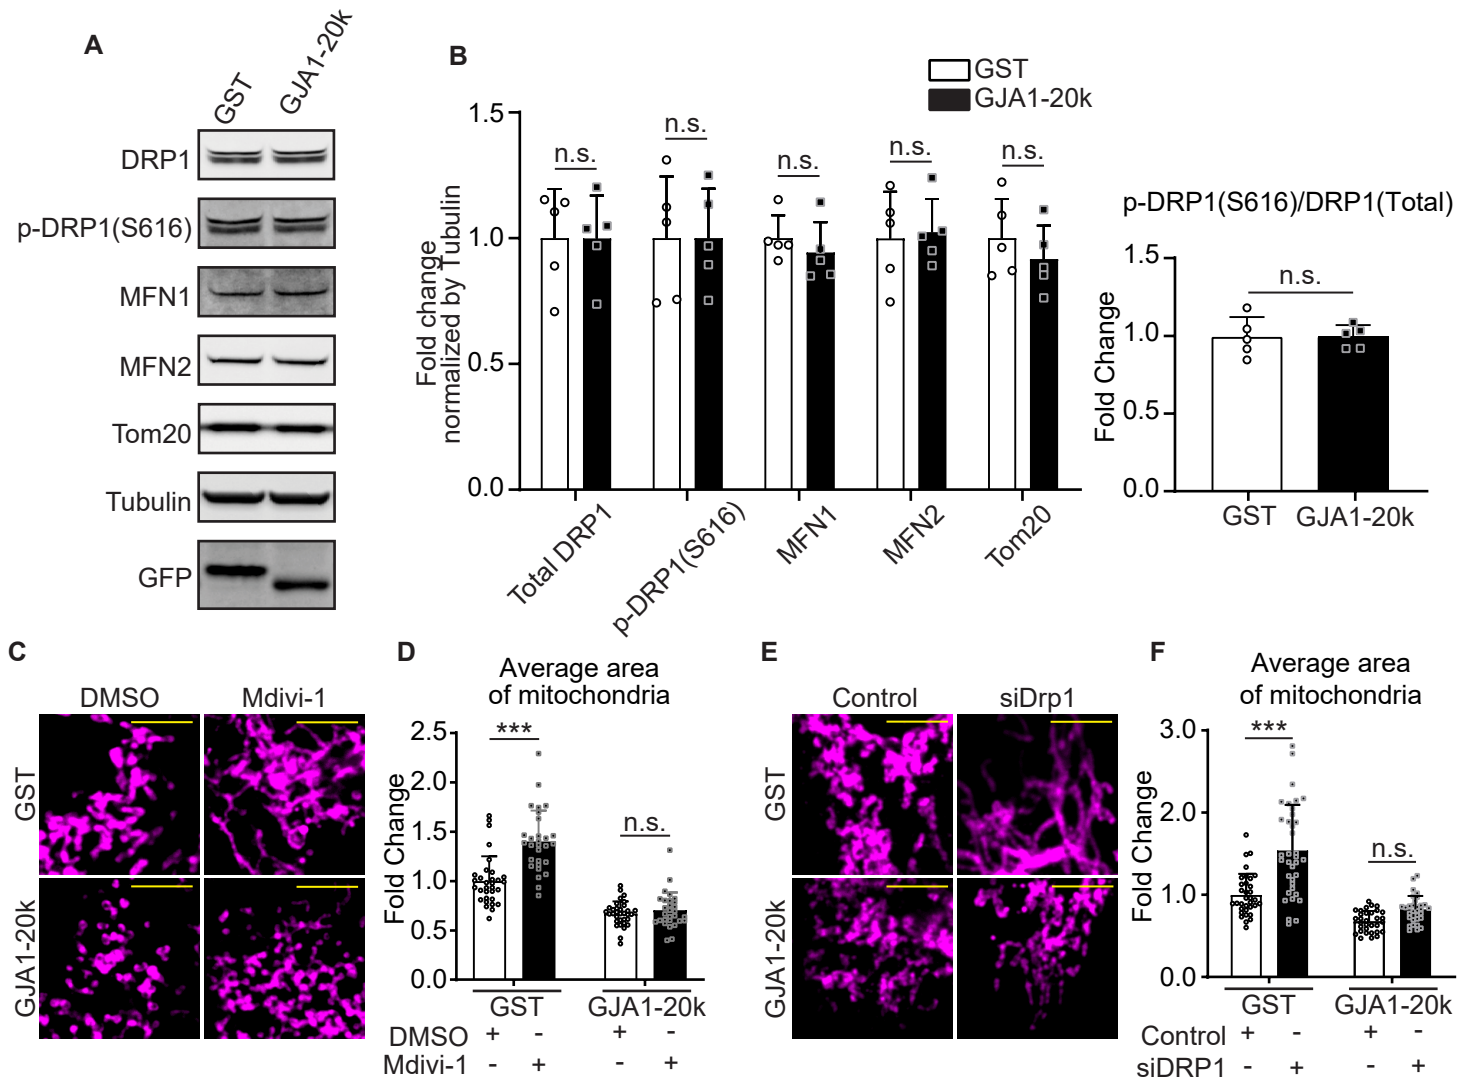

### Figure 2. DRP1 is not involved in GJA1-20k mediated mitochondrial fission

(A) and (B), Western blot analysis for mitochondrial dynamics related proteins. Transfection was confirmed by GFP bands and the band size difference in GFP is due to the difference in molecular weight between GST and GJA1-20k (A). Tubulin was used as internal loading control.  $n = 5$  independent experimental repeats. (C) and (E) Representative fixed cell images of mitochondria (visualized by Tom20) with or without Mdivi-1 (C) or DRP1 siRNA treatment (E). (D) and (F) The fold change in the average area of mitochondria in each treatment.  $n = 32$  (GST, DMSO), 33 (GJA1-20k, DMSO), or 29 (GST or GJA1-20k, Mdivi-1) cells (D);  $n = 34$  (GST, control siRNA), 32 (GJA1-20k, control siRNA), 36 (GST, DRP1 siRNA), or 31 (GJA1-20k, DRP1 siRNA) cells (F) from three independent experiments. Graphs were expressed as mean  $\pm$  SD. p values were determined by two-tailed Mann-Whitney U-test or two-way ANOVA with Bonferroni's post-hoc test. \*\*\* $p < 0.001$ ; n.s., not significant. Scale bars, 5  $\mu$ m (C and E). Exact p values and statistical data are provided in the source data.

## Figure 3

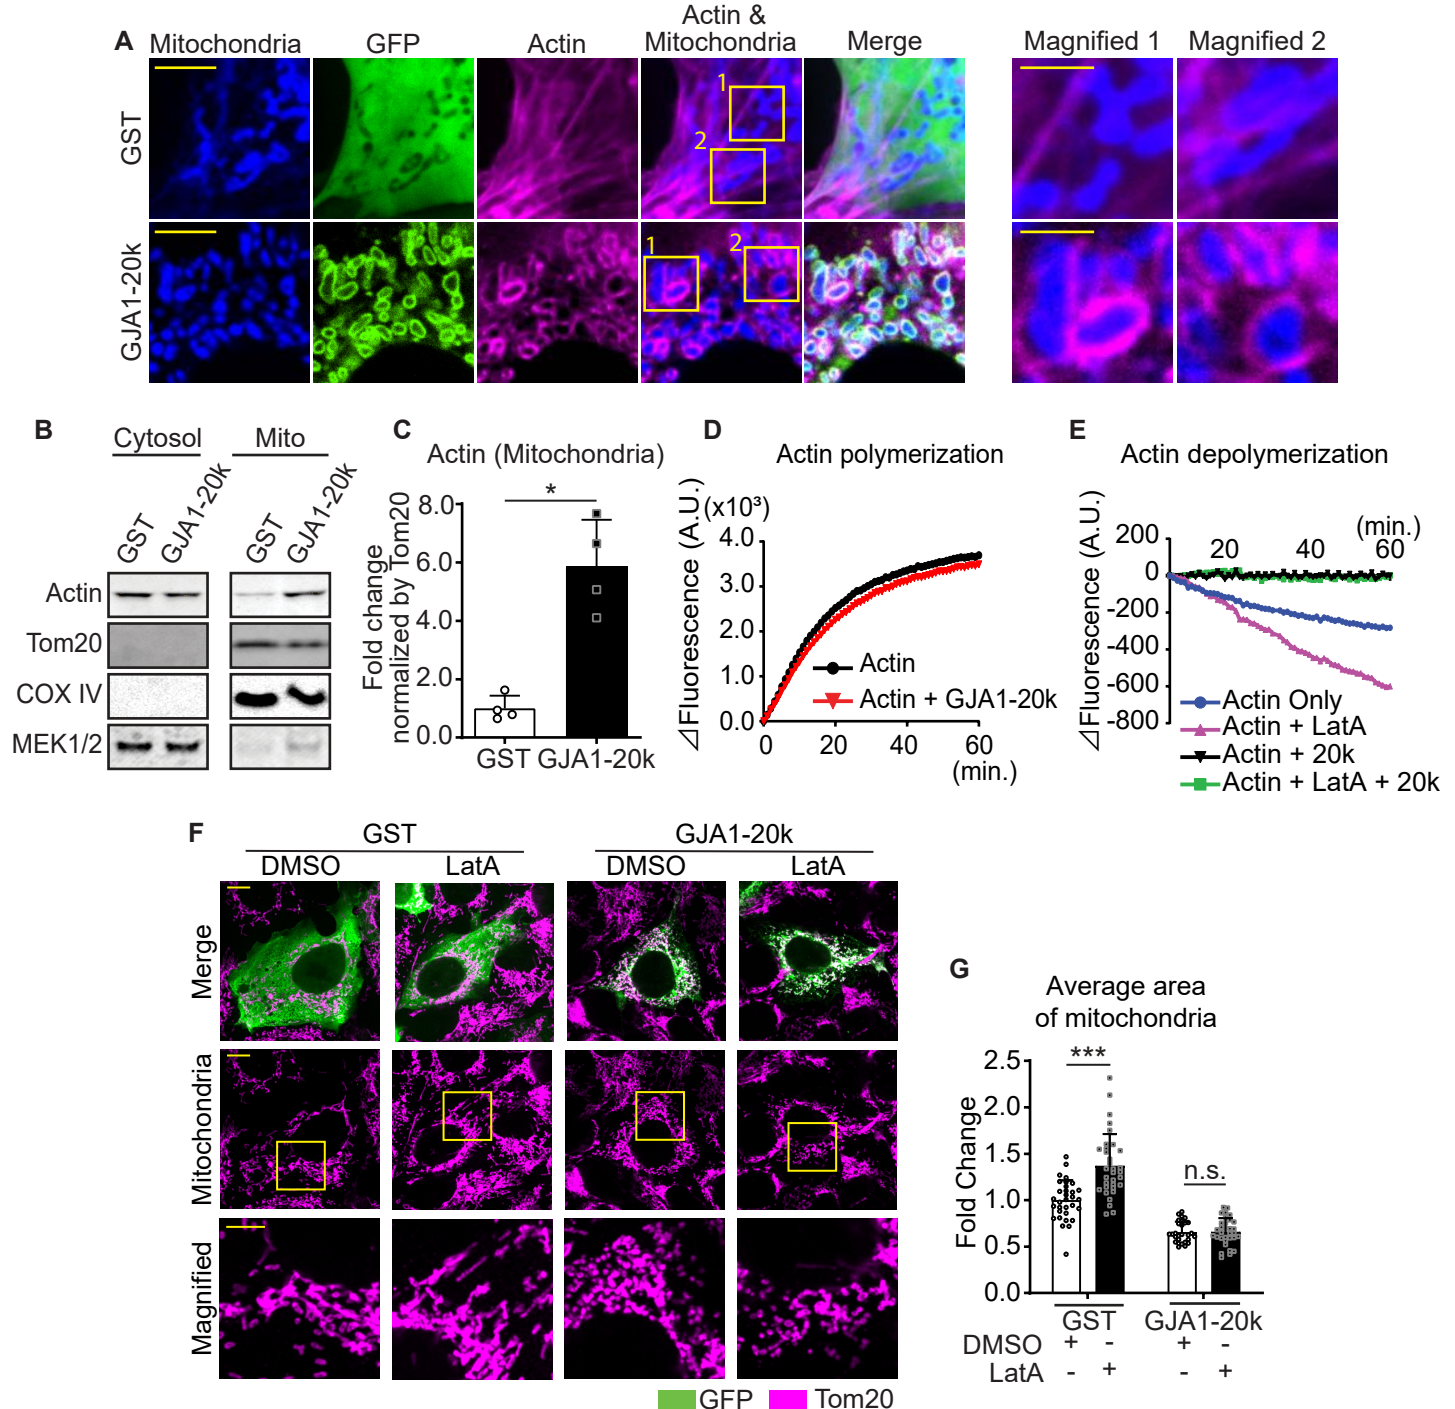

### Figure 3. GJA1-20k stabilizes and recruits actin around mitochondria for fission

(A) Representative live cell images of mitochondria with or without GJA1-20k. Actin was labeled by co-transfection with lifeAct-mCherry. The right-most panels indicate magnified images. (B) and (C) Western blot analysis in cytosol or mitochondrial fraction. MEK1/2 was used as cytosol marker and Tom20 and COX IV as mitochondrial markers (B). Quantification of actin in mitochondrial fraction normalized by Tom20 expression (C).  $n = 4$  independent experimental repeats. (D) and (E) Cell-free actin polymerization (D) and depolymerization (E) assay. (F) Representative fixed cell images of mitochondria (visualized by Tom20) with or without LatA. (G) The fold change in the average area of mitochondria with or without LatA treatment.  $n = 32$  (GST, DMSO), 33 (GST, LatA), 28 (GJA1-20k, DMSO), or 32 (GJA1-20k, LatA) cells from three independent experiments. Graphs were expressed as mean  $\pm$  SD.  $p$  values were determined by two-tailed Mann-Whitney U-test or two-way ANOVA with Bonferroni's post-hoc test. \* $p < 0.05$ , \*\*\* $p < 0.001$ ; n.s., not significant. Scale bars, 10  $\mu\text{m}$  (F), 5  $\mu\text{m}$  (A and magnified in F) and 2  $\mu\text{m}$  (magnified in A). Exact  $p$  values and statistical data are provided in the source data.

## Figure 4

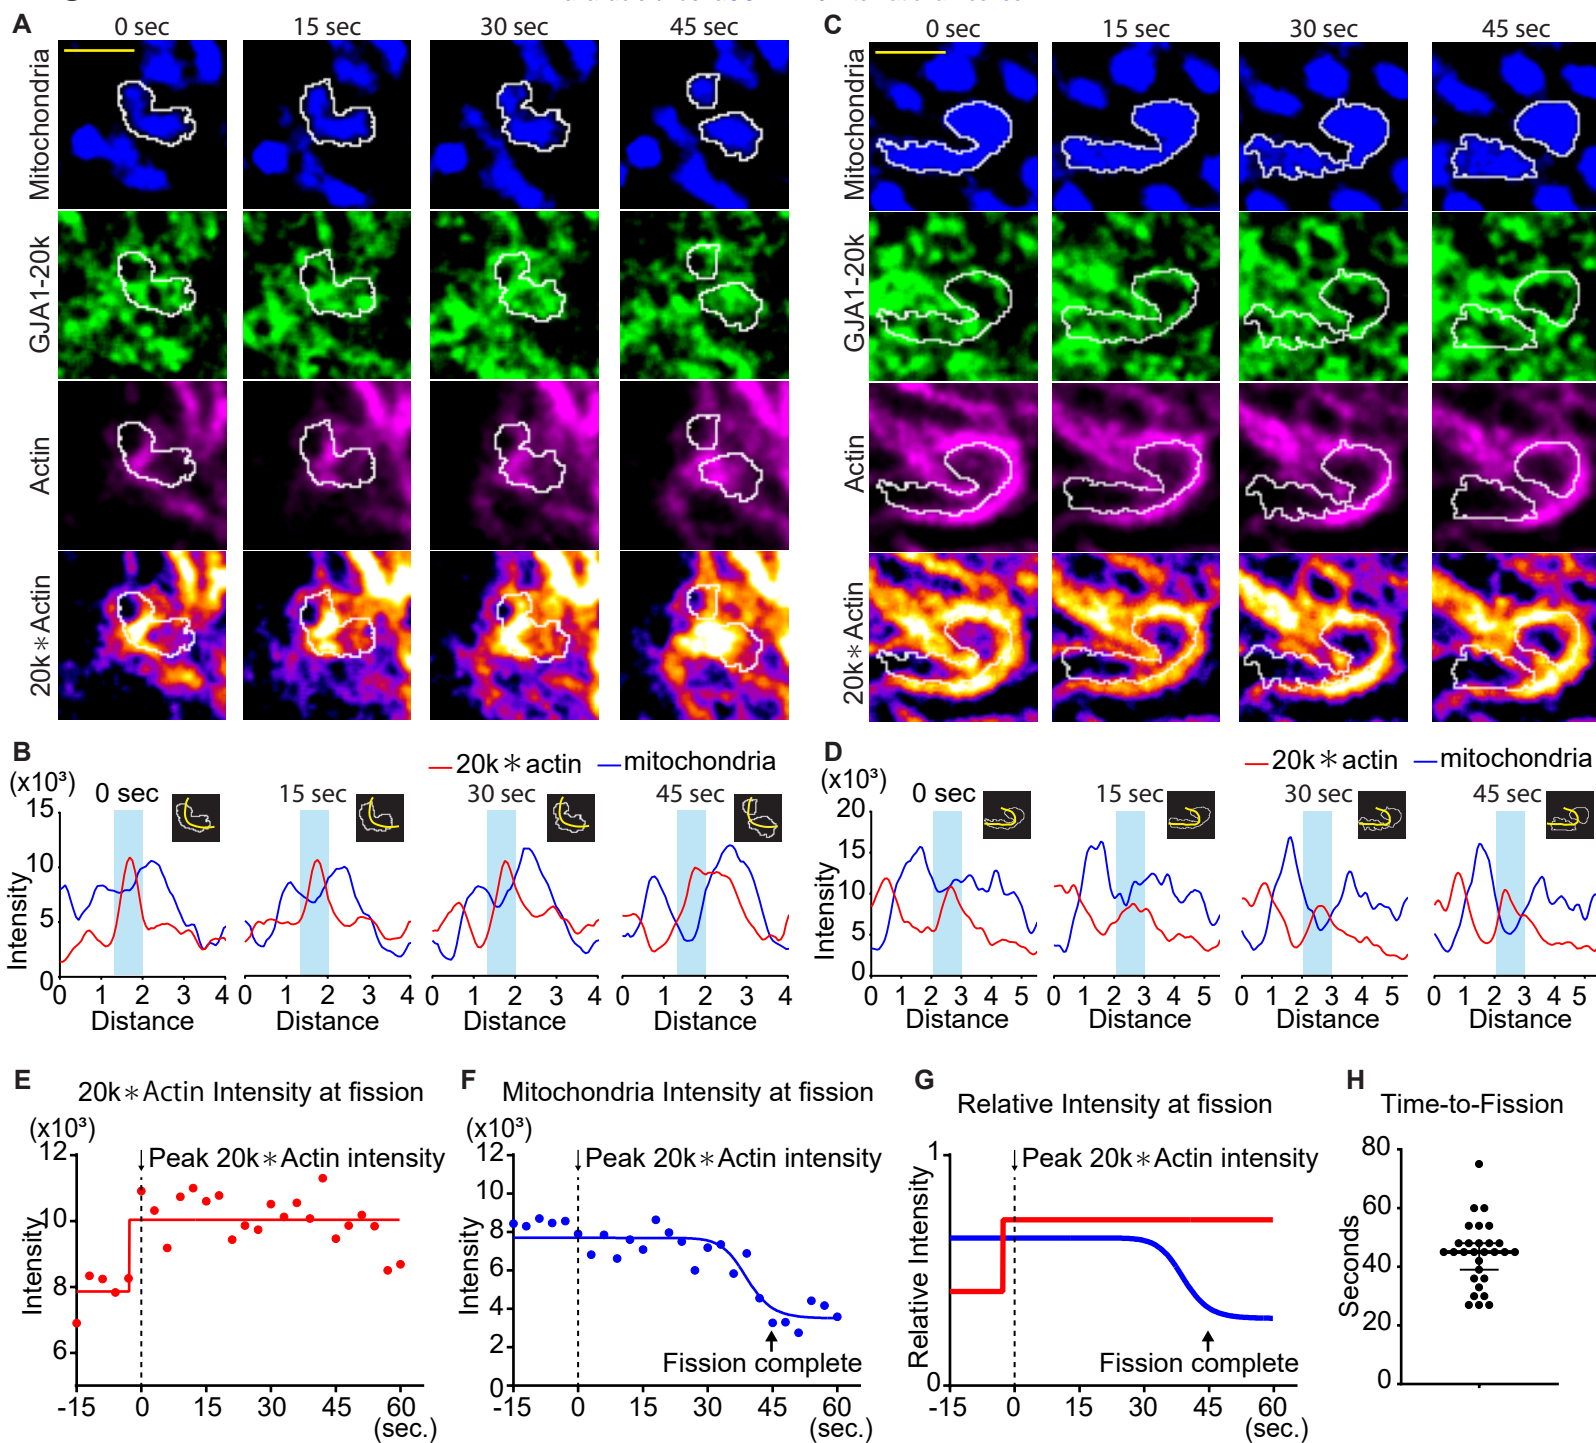

**Figure 4. Time course of mitochondria dynamics and actin accumulation at the mitochondrial fission site under Mdivi-1 treatment**

(A) and (C) Representative mitochondrial dynamics in GJA1-20k-transfected cells by time-lapse live cell imaging under Mdivi-1 treatment. The bottom images (with fire look-up table) indicate the product of GJA1-20k and actin signals. The white lines indicate mitochondrial outlines. Scale bars, 2  $\mu\text{m}$ . (B) and (D) The intensity of mitochondria and the product of GJA1-20k and actin from (A) and (C), respectively. The colored areas indicate fission sites along the lines shown in each respective insert. (E)–(G) The time course of the product of GJA1-20k and actin intensity (E), mitochondrial intensity (F), or combined relative intensity (G) at the fission site from the mitochondrion shown in (A). Curves are four parameter logistic (4PL) fits to the data. Time 0 corresponds to the peak product of actin and GJA1-20k intensity. The arrows indicate the time point at which fission is complete. (H) Measured time from peak product of actin and GJA1-20k intensity to fission in seconds (bars indicate median and 95% confidence interval).  $n = 29$  events. All data points are provided in the source data.

## Figure 5

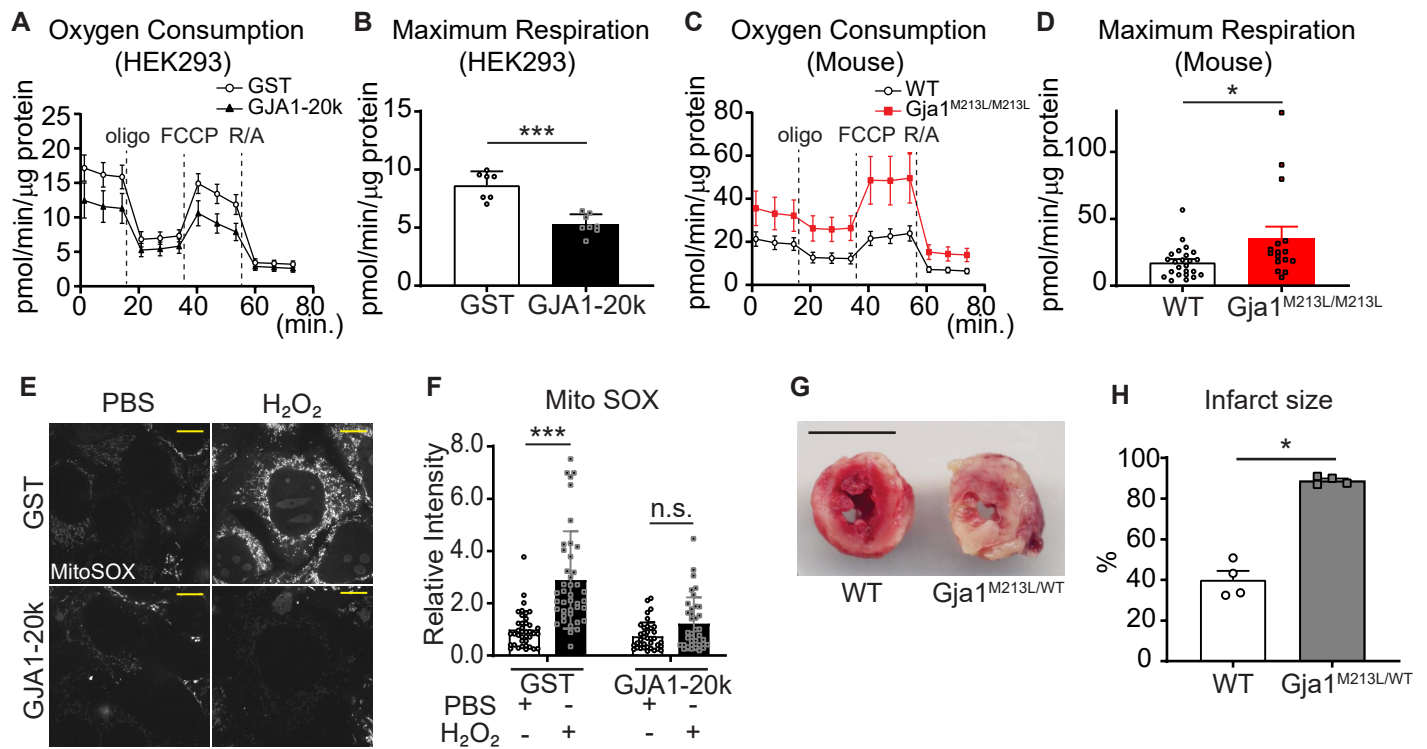

### Figure 5. Mitochondrial metabolic function is preserved by GJA1-20k

(A)–(D) Real-time change in OCR by Seahorse assay and the maximum respiration in HEK293 cells (A and B) and mouse neonatal CM (C and D). 7 (GST) or 8 (GJA1-20k) replicates from HEK293 cells; n = 24 (WT from 4 hearts) or 16 (Gja1<sup>M213L/M213L</sup> from 3 hearts) replicates. (E) Representative live cell images of MitoSOX with or without H<sub>2</sub>O<sub>2</sub> treatment to GST- or GJA1-20k-transfected HEK293 cells. (F) Relative intensity of MitoSOX. n = 39 (GST, PBS), 41 (GST, H<sub>2</sub>O<sub>2</sub>), or 37 (GJA1-20k, PBS or H<sub>2</sub>O<sub>2</sub>) cells from three independent experiments. (G) Representative images of TTC stained hearts from WT and Gja1<sup>M213L/WT</sup> mice after I/R. (H) Quantification of infarct size after I/R. n = 4. Graphs were expressed as mean ± SD (HEK293) or SEM (mouse). p values were determined by two-tailed Mann-Whitney U-test or two-way ANOVA with Bonferroni's post-hoc test. \*p < 0.05, \*\*\*p < 0.001; n.s., not significant. Scale bars, 10 μm (E); 5 mm (G). Exact p values and statistical data are provided in the source data.

## Figure 6

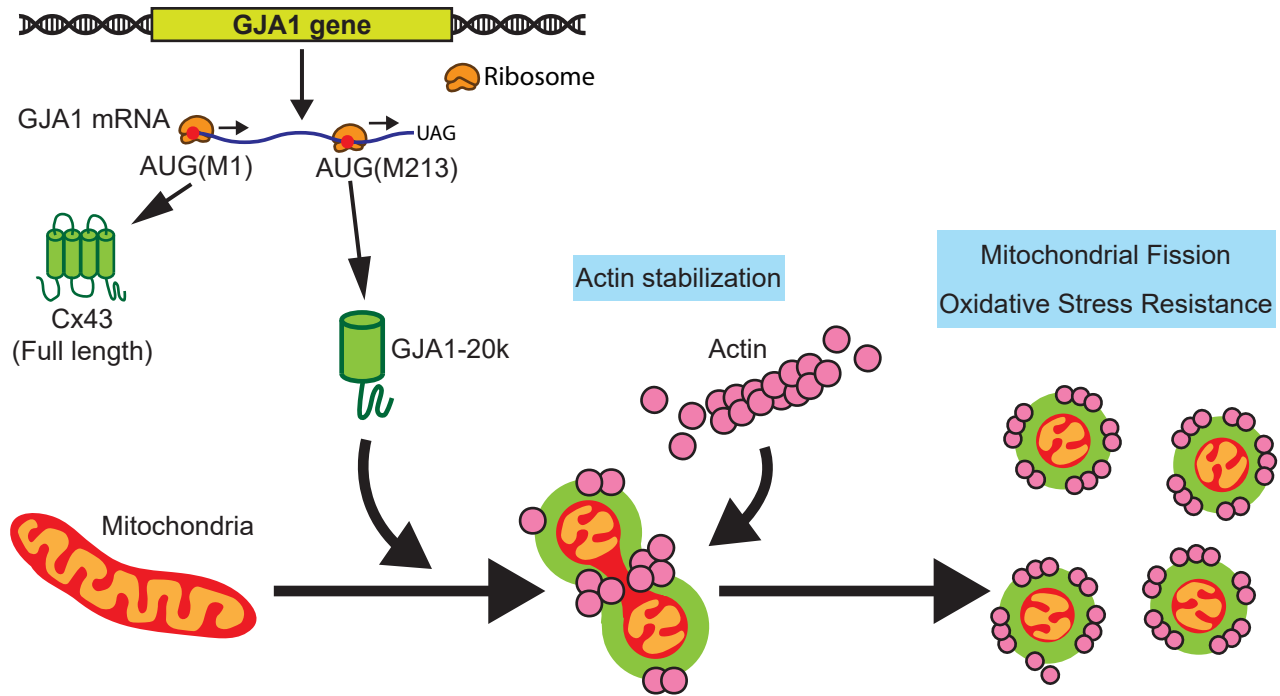

### Figure 6. Schematic summary

GJA1-20k, internally translated from Gja1 mRNA, localizes mitochondria membrane, stabilizes actin cytoskeleton, and recruits actin around mitochondria to both induce mitochondrial fission and achieve oxidative stress resistance.

## Figure 1—figure supplement 1

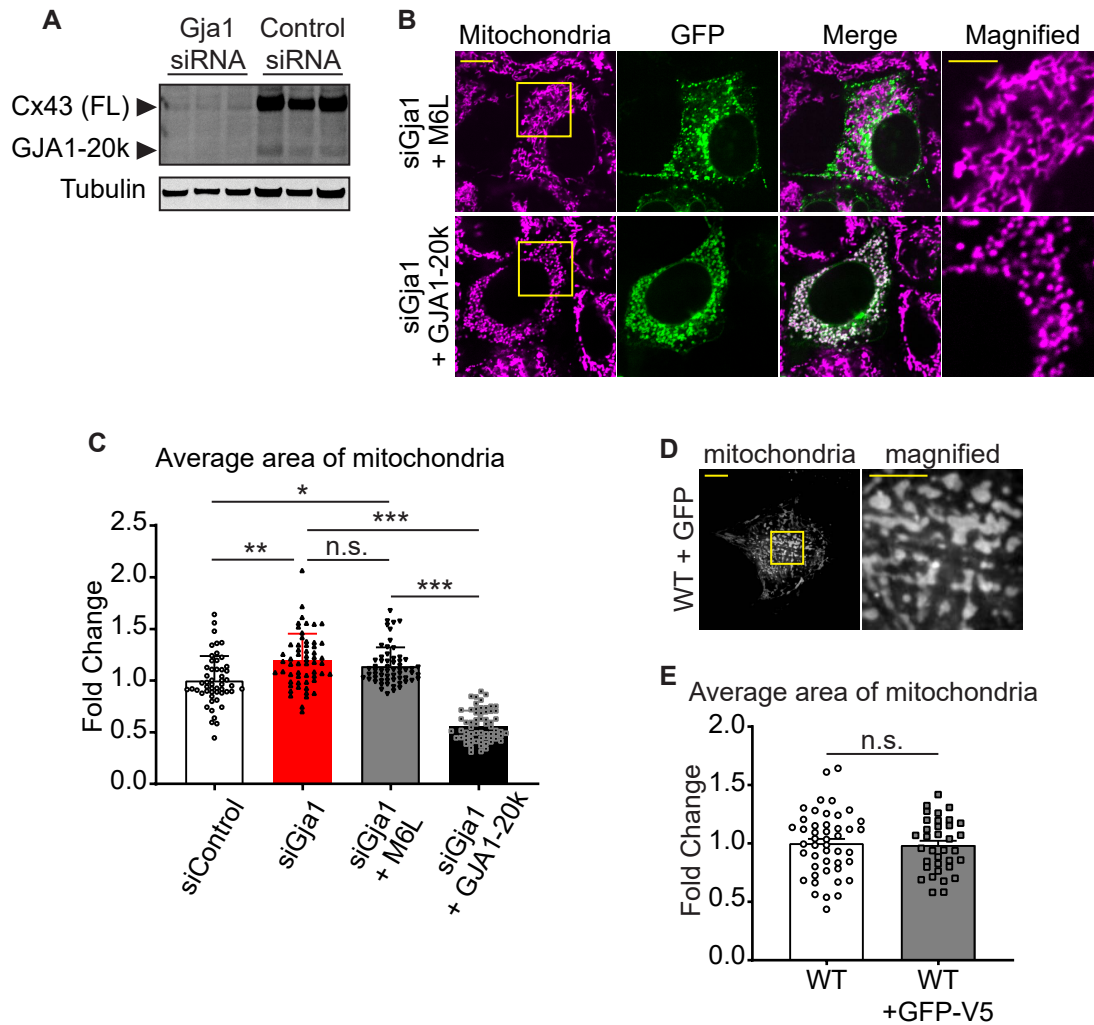

### The confirmation of Gja1 knock-down and the mitochondrial morphology rescued by GJA1-20k

(A) Western blot analysis for Gja1 knock-down by siRNA. Tubulin was used as internal loading control.  $n = 3$  independent experimental repeats. (B) The representative confocal live cell imaging of Gja1 knocked-down HEK293 cells with Cx43-M6L or GJA1-20k transfection. (C) The fold change in the average area of individual mitochondria.  $n = 52$  (Control), 57 (siGja1), 60 (siGja1 + M6L), or 64 (siGja1 + GJA1-20k) cells from five independent experiments. The images and the values of Control and siGja1 are also shown in Figure 1. (D) The representative live cell imaging of mitochondria in WT mouse neonatal CMs with adenovirus-mediated GFP induction. The right panel indicates magnified image surrounded by square. (E) The fold change in the average area of individual mitochondria between WT (no virus introduction, the image and the value shown in Figure 1) and GFP-V5 introduction.  $n = 46$  (WT) or 35 (GFP) cells from 4 hearts. Graphs were expressed as mean  $\pm$  SD (C) or SEM (E).  $p$  values were determined by two-tailed Mann-Whitney U-test or Kruskal-Wallis test with Dunn's post-hoc test. \* $p < 0.05$ , \*\* $p < 0.01$ , \*\*\* $p < 0.001$ ; n.s., not significant. Scale bars, 10  $\mu\text{m}$  or 5  $\mu\text{m}$  in magnified image. Exact  $p$  values and statistical data are provided in the source data.



## Figure 2—figure supplement 1

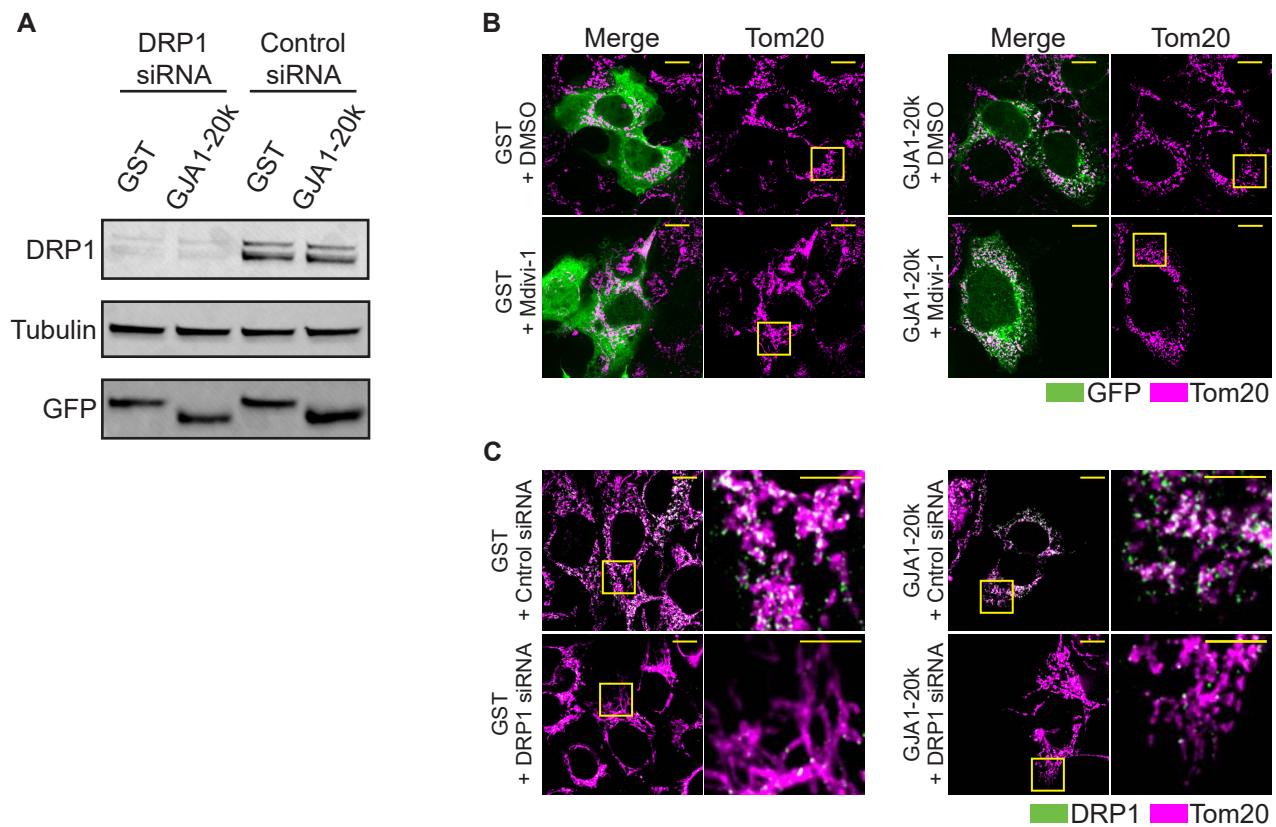

**The confirmation of DRP1 knock-down by siRNA and the mitochondrial morphology rescued by GJA1-20k**  
(A) Western blot analysis for DRP1 knock-down by siRNA. n = 3 independent experimental repeats. (B) and (C) The representative fixed cell images of mitochondria (visualized by Tom20) with or without Mdivi-1 (B), or siDRP1 (C) treatment. The magnified mitochondria images surrounded by the square are used in Figure 2. Scale bars, 10  $\mu$ m (B and C) or 5  $\mu$ m in magnified image (C).

## Figure 5—figure supplement 1

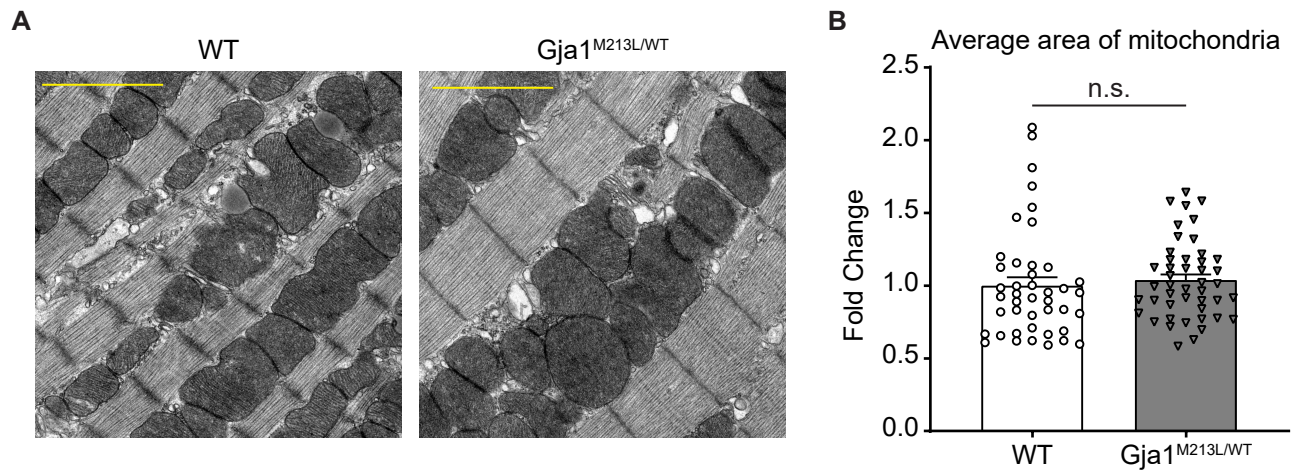

**The mitochondria size did not change in adult mouse heart between WT and heterozygous  $Gja1^{M213L/WT}$**

(A) The representative electron microscope images from adult mouse hearts (WT or  $Gja1^{M213L/WT}$ ). Scale bars, 2  $\mu$ m.

(B) The fold change in the average area of individual mitochondria. n = 43 (WT) or 46 ( $Gja1^{M213L/WT}$ ) images from 3 hearts. Graph was expressed as mean  $\pm$  SEM. p value was determined by two-tailed Mann-Whitney U-test. n.s., not significant. Exact p values and statistical data are provided in the source data.
